# Supplementary material for: Social and clinical vulnerability in stroke and STEMI management during the COVID-19 pandemic: a registry-based study
Source: PubMed Central journal article supplement — BMJ Open. 2024 Jan 3;14(1):e073933. doi: 10.1136/bmjopen-2023-073933 (PMC10773394; doi:10.1136/bmjopen-2023-073933), 2024-01-03
Supplement: bmjopen-2023-073933.draft_revisions.pdf [file bmjopen-2023-073933.draft_revisions.pdf]

# BMJ Open

BMJ Open is committed to open peer review. As part of this commitment we make the peer review history of every article we publish publicly available.

When an article is published we post the peer reviewers' comments and the authors' responses online. We also post the versions of the paper that were used during peer review. These are the versions that the peer review comments apply to.

The versions of the paper that follow are the versions that were submitted during the peer review process. They are not the versions of record or the final published versions. They should not be cited or distributed as the published version of this manuscript.

BMJ Open is an open access journal and the full, final, typeset and author-corrected version of record of the manuscript is available on our site with no access controls, subscription charges or pay-per-view fees (<http://bmjopen.bmj.com>).

If you have any questions on BMJ Open's open peer review process please email [info.bmjopen@bmj.com](mailto:info.bmjopen@bmj.com)

# BMJ Open

## Social and clinical vulnerability in stroke and STEMI management during the COVID-19 pandemic: A registry-based study

|                               |                                                                                                                                                                                                                                                                                                                                                                                                                                                                                                                                                                                                                                                                                                                                                                                                                                                                                                                                                                                                                                                                                                                                                                                                                                                                                                                                                                                                                                                                                                                                                                                                                                          |
|-------------------------------|------------------------------------------------------------------------------------------------------------------------------------------------------------------------------------------------------------------------------------------------------------------------------------------------------------------------------------------------------------------------------------------------------------------------------------------------------------------------------------------------------------------------------------------------------------------------------------------------------------------------------------------------------------------------------------------------------------------------------------------------------------------------------------------------------------------------------------------------------------------------------------------------------------------------------------------------------------------------------------------------------------------------------------------------------------------------------------------------------------------------------------------------------------------------------------------------------------------------------------------------------------------------------------------------------------------------------------------------------------------------------------------------------------------------------------------------------------------------------------------------------------------------------------------------------------------------------------------------------------------------------------------|
| Journal:                      | <i>BMJ Open</i>                                                                                                                                                                                                                                                                                                                                                                                                                                                                                                                                                                                                                                                                                                                                                                                                                                                                                                                                                                                                                                                                                                                                                                                                                                                                                                                                                                                                                                                                                                                                                                                                                          |
| Manuscript ID                 | bmjopen-2023-073933                                                                                                                                                                                                                                                                                                                                                                                                                                                                                                                                                                                                                                                                                                                                                                                                                                                                                                                                                                                                                                                                                                                                                                                                                                                                                                                                                                                                                                                                                                                                                                                                                      |
| Article Type:                 | Original research                                                                                                                                                                                                                                                                                                                                                                                                                                                                                                                                                                                                                                                                                                                                                                                                                                                                                                                                                                                                                                                                                                                                                                                                                                                                                                                                                                                                                                                                                                                                                                                                                        |
| Date Submitted by the Author: | 22-Mar-2023                                                                                                                                                                                                                                                                                                                                                                                                                                                                                                                                                                                                                                                                                                                                                                                                                                                                                                                                                                                                                                                                                                                                                                                                                                                                                                                                                                                                                                                                                                                                                                                                                              |
| Complete List of Authors:     | <p>Lesaine, Emilie; CHU de Bordeaux, CIC-EC 14-01; Bordeaux Population Health, University of Bordeaux, ISPED, Centre INSERM U1219</p> <p>Francis, Florence; CHU de Bordeaux, Pôle de santé publique, Service d'Information Médicale ; Bordeaux Population Health, University of Bordeaux, ISPED, Centre INSERM U1219</p> <p>Domecq, Sandrine; CHU de Bordeaux, CIC-EC 14-01; Bordeaux Population Health, University of Bordeaux, ISPED, Centre INSERM U1219</p> <p>Miganeh-Hadi, Sahal; CHU de Bordeaux, CIC-EC 14-01; Bordeaux Population Health, University of Bordeaux, ISPED, Centre INSERM U1219</p> <p>Sevin, Floriane; CHU de Bordeaux, CIC-EC 14-01; Bordeaux Population Health, University of Bordeaux, ISPED, Centre INSERM U1219</p> <p>Sibon, Igor; CHU Bordeaux GH Pellegrin, Stroke Unit; INCIA, CNRS UMR 5287</p> <p>Rouanet, François; Centre Hospitalier Universitaire de Bordeaux Groupe hospitalier Pellegrin, Stroke unit</p> <p>Pradeau, Catherine; CHU de Bordeaux, Pôle de médecine d'urgence</p> <p>Coste, Pierre; CHU de Bordeaux Hôpital Cardiologique, Coronary Care Unit</p> <p>Cetran, Laura; CHU de Bordeaux Hôpital Cardiologique, Coronary Care Unit</p> <p>Vandentorren, Stephanie ; Sante publique France; Bordeaux Population Health, University of Bordeaux, ISPED, Centre INSERM U1219</p> <p>Saillour, Florence; CHU de Bordeaux, Pôle de santé publique, Service d'Information Médicale; Bordeaux Population Health, University of Bordeaux, ISPED, Centre INSERM U1219</p> <p>AVICOVID Group, AVICOVID Group; Bordeaux Population Health, University of Bordeaux, ISPED, Centre INSERM U1219</p> |
| Keywords:                     | <p>COVID-19, Quality in health care &lt; HEALTH SERVICES ADMINISTRATION &amp; MANAGEMENT, Health policy &lt; HEALTH SERVICES ADMINISTRATION &amp; MANAGEMENT, Organisation of health services &lt; HEALTH SERVICES ADMINISTRATION &amp; MANAGEMENT, Health Services Accessibility, Health Equity</p>                                                                                                                                                                                                                                                                                                                                                                                                                                                                                                                                                                                                                                                                                                                                                                                                                                                                                                                                                                                                                                                                                                                                                                                                                                                                                                                                     |

1  
2  
3  
4  
5  
6  
7  
8  
9  
10  
11  
12  
13  
14  
15  
16  
17  
18  
19  
20  
21  
22  
23  
24  
25  
26  
27  
28  
29  
30  
31  
32  
33  
34  
35  
36  
37  
38  
39  
40  
41  
42  
43  
44  
45  
46  
47  
48  
49  
50  
51  
52  
53  
54  
55  
56  
57  
58  
59  
60

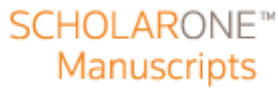

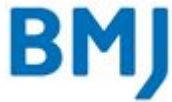

I, the Submitting Author has the right to grant and does grant on behalf of all authors of the Work (as defined in the below author licence), an exclusive licence and/or a non-exclusive licence for contributions from authors who are: i) UK Crown employees; ii) where BMJ has agreed a CC-BY licence shall apply, and/or iii) in accordance with the terms applicable for US Federal Government officers or employees acting as part of their official duties; on a worldwide, perpetual, irrevocable, royalty-free basis to BMJ Publishing Group Ltd ("BMJ") its licensees and where the relevant Journal is co-owned by BMJ to the co-owners of the Journal, to publish the Work in this journal and any other BMJ products and to exploit all rights, as set out in our [licence](#).

The Submitting Author accepts and understands that any supply made under these terms is made by BMJ to the Submitting Author unless you are acting as an employee on behalf of your employer or a postgraduate student of an affiliated institution which is paying any applicable article publishing charge ("APC") for Open Access articles. Where the Submitting Author wishes to make the Work available on an Open Access basis (and intends to pay the relevant APC), the terms of reuse of such Open Access shall be governed by a Creative Commons licence – details of these licences and which [Creative Commons](#) licence will apply to this Work are set out in our licence referred to above.

Other than as permitted in any relevant BMJ Author's Self Archiving Policies, I confirm this Work has not been accepted for publication elsewhere, is not being considered for publication elsewhere and does not duplicate material already published. I confirm all authors consent to publication of this Work and authorise the granting of this licence.

1  
2  
3 **Social and clinical vulnerability in stroke and STEMI management during the COVID-19**  
4 **pandemic: A registry-based study**  
5  
6

7  
8 Emilie Lesaine<sup>ab</sup>, Florence Francis<sup>ac</sup>, Sandrine Domecq<sup>ab</sup>, Sahal Miganeh-Hadi <sup>ab</sup>, Floriane Sevin<sup>ab</sup>, Igor  
9 Sibon<sup>de</sup>, François Rouanet<sup>d</sup>, Catherine Pradeau<sup>f</sup>, Pierre Coste<sup>g</sup>, Laura Cetran<sup>g</sup>, Stéphanie Vandentorren<sup>ah</sup>,  
10 Florence Saillour-Glénisson<sup>ac</sup> and the AVICOVID group<sup>a</sup>  
11  
12  
13

14 a Bordeaux Population Health, University of Bordeaux, ISPED, Centre INSERM U1219, Bordeaux,  
15 Nouvelle-Aquitaine, FR.

16 b CHU de Bordeaux, CIC-EC 14-01, Bordeaux, Aquitaine, FR.

17 c CHU de Bordeaux, Pôle de santé publique, Service d'Information Médicale, Bordeaux, Aquitaine,  
18 FR.

19 d CHU de Bordeaux, Stroke Unit, Bordeaux, FR.

20 e University of Bordeaux, INCIA CNRS UMR 5287, Bordeaux, FR.

21 f CHU de Bordeaux, Pôle de médecine d'urgence, Bordeaux, Aquitaine, FR

22 g CHU de Bordeaux Hôpital Cardiologique, Coronary Care Unit, Pessac, Nouvelle-Aquitaine, FR.

23 h Sante Publique France, Saint Maurice, FR  
24  
25  
26  
27  
28  
29  
30

31 **Corresponding author**

32 Dr Emilie Lesaine

33 Institut de Santé Publique, d'Epidémiologie et de Développement (ISPED)

34 146, rue Léo Saignat, 33076 Bordeaux Cedex

35 Telephone number: +(33) 557579249

36 Email: emilie.lesaine@u-bordeaux.fr  
37  
38  
39  
40  
41  
42  
43  
44  
45  
46  
47  
48  
49  
50  
51  
52  
53  
54  
55  
56  
57  
58  
59  
60

## ABSTRACT

**Objective:** To evaluate whether the first wave of the COVID-19 pandemic resulted in a deterioration in the quality of care for socially and/or clinically vulnerable stroke and ST-segment elevation myocardial infarction (STEMI) patients.

**Design:** Two cohorts of STEMI and stroke patients in the Aquitaine neuro-cardiovascular (CNV) registry.

**Setting:** Six emergency medical services, 30 emergency units, 14 hospitalisation units, and 11 catheterisation laboratories in the Aquitaine region in France.

**Participants:** This study involved 9218 patients (6436 stroke and 2782 STEMI patients) in the CNV registry from January 2019 to August 2020.

**Method:** Associations between social (deprivation index) and clinical (age > 65 years, neuro-cardiovascular history) vulnerabilities and care management times were analysed using multivariate linear mixed models, with an interaction on the time period (pre-, per-, and post-first COVID-19 wave).

**Main outcome measures:** STEMI cohort, first medical contact-to-procedure time; stroke cohort, emergency unit admission-to-imaging time.

**Results:** The first medical contact-procedure time was longer for elderly ( $p < 0.001$ ) and "very socially disadvantaged" ( $p = 0.003$ ) STEMI patients, with no interaction regarding the COVID-19 period (age,  $p = 0.54$ ; neuro-cardiovascular history,  $p = 0.70$ ; deprivation,  $p = 0.64$ ). We found no significant association between vulnerabilities and the admission-imaging time for stroke patients, and no interaction with respect to the COVID-19 period (age,  $p = 0.81$ ; neuro-cardiovascular history,  $p = 0.34$ ; deprivation,  $p = 0.95$ ).

**Conclusions:** This study revealed pre-existing inequalities in care management times for vulnerable STEMI and stroke patients; however, these inequalities were neither accentuated nor reduced during the first COVID-19 wave. Measures implemented during the crisis did not alter the well-structured emergency pathway for these patients.

**Trial registration:** NCT04979208

## STRENGTHS AND LIMITATIONS OF THIS STUDY

- The study analysed two large high-quality data cohorts comprising almost 10000 stroke and STEMI patients, managed in a large panel of care structures throughout the Aquitaine region, over a period of several months before and after the first wave.
- We studied vulnerabilities from two perspectives, a social perspective through an ecological social deprivation index and a clinical perspective through risk factors of severe COVID-19.
- The explanatory analyses yield robust results due to the large amount of data collected (clinical and socio-geographical characteristics, acute care management pathway data), enabling integration of a wide variety of confounders.
- The exclusion of patients who did not enter the healthcare system prevented quantification of healthcare system avoidance, that is supposed to have been more frequent among socially and/or clinically vulnerable patients during the COVID-19 pandemic.
- The study area was limited to the Aquitaine region, one of the regions least affected by the first wave of the COVID-19 pandemic in France; this situation could have led to the exertion of less pressure on health services.

## INTRODUCTION

ST-segment elevation myocardial infarction (STEMI) and stroke are life-threatening and highly time-sensitive emergencies. The time elapsed from symptom onset to treatment is a predictor of patients' mortality and functional recovery.(1,2) The standardised and timed care pathways for these two diseases depend initially on a patient's use of the emergency medical service (EMS) system, followed by close collaboration between emergency structures and specialised technical platforms (e.g., catheterisation laboratories, stroke units).(1,2) The quality of care is often evaluated under the prism of the time from first medical contact (FMC) to treatment.(1,2)

Patients with STEMI and stroke face social and health inequality issues. Socially vulnerable (i.e., disadvantaged) patients with neuro-cardiovascular diseases have higher morbidity and mortality rates.(3,4) Four markers of social position and socioeconomic status have been associated with cardiovascular disease in high-income countries: income level, educational attainment, employment status, and environmental factors.(5) These inequalities are attributable to a higher prevalence of biological, behavioral and psychosocial cardiovascular risk factors in the more socially disadvantaged population but also to more difficulties in accessing healthcare and lower-quality acute care management.(4,6,7) The organisation of the healthcare system, as a social health determinant, leads to health inequalities, due mainly to challenges related to communication and health literacy, implicit bias, and/or a lack of culturally competent care.(8)

The 2019 coronavirus disease (COVID-19) dramatically modified healthcare systems worldwide and had major consequences for patients' access to care for stroke and STEMI.(9–11) From February to March 2020, many health authorities, including those in France, implemented strict nationwide lockdowns and series of policies to curb the surge of patients requiring critical care. This crisis, and particularly the lockdown periods, induced the major reorganisation of healthcare systems and modified the use of care to accommodate the onslaught of patients with COVID-19.(12) Studies of the association between the COVID-19 pandemic and the quality of stroke and STEMI management have yielded contrasting results, with most revealing longer management delays and reductions in the number of procedures performed.(9,10,13)

During pandemics (e.g., of influenza, plague), pre-existing inequalities affecting many aspects of patients' care pathways (e.g., loss of employment and income; social isolation, especially for elderly individuals; and mental health issues, particularly for young people) are usually amplified.(14–18) During the COVID-19 pandemic, COVID-19 exposure, severe disease, hospitalisation, and death were more frequent among socially disadvantaged people.(15,17–19) This population benefited less from the collective protective measures taken against COVID-19, had more difficulty accessing preventative healthcare, and had lower rates of COVID-19 testing and vaccination.(14) Some experts consider COVID-19 to be a syndemic, rather than a pandemic. These interactions between COVID-19 and pre-existing socioeconomic inequalities in non-communicable diseases are an illustration.(16) Indeed,



1  
2  
3 “syndemics are characterised by biological and social interactions between conditions and states,  
4 interactions that increase a person’s susceptibility to harm or worsen their health outcomes.”(16)

5  
6 In France, to protect more vulnerable patients and adapt care, health authorities identified several risk  
7 factors of severe COVID-19 based on demographic (advanced age) and medical (especially  
8 cardiovascular co-morbidities) characteristics.(20) Information about these risk factors was covered  
9 widely in the media which may have led exposed individuals with these underlying conditions to delay  
10 seeking treatment.(21) Additional protective measures may have been implemented for these exposed  
11 populations, resulting in increased management delays.

12  
13 To our knowledge, only one study has evaluated whether COVID-19 modified the associations among  
14 the educational level, deprivation, hospital admission indicators, and quality of hospital care, especially  
15 for patients with neuro-cardiovascular diseases.(22) The researchers found larger declines in the hospital  
16 access of women, elderly, and less-educated individuals; in contrast, the timeliness of percutaneous  
17 coronary intervention (PCI) showed no education- or deprivation-related gradient.

18  
19 Since 2012, the “CNV Registry” of neuro-cardiovascular diseases evaluate the care pathways for STEMI  
20 and stroke patients in the Aquitaine region of southwestern France (3 million inhabitants). This registry  
21 provides a unique opportunity to study differences in care management and their evolution over time in  
22 a country with universal health coverage.(23)

23  
24 COVID-19 profoundly modified access to and the use and organisation of care, against a backdrop of  
25 pre-existing inequalities in neuro-cardiovascular disease.(12) The notion of a “syndemic” and our  
26 hypothesis that management times were longer for patients at risk of severe COVID-19 during its first  
27 wave prompted our investigation of whether first COVID-19 wave resulted in the deterioration of the  
28 quality of care for socially and clinically vulnerable stroke and STEMI patients, using data from the  
29 CNV Registry.

## 30 31 32 33 34 35 36 37 38 39 **METHODS**

### 40 41 **Study design and population**

42 We used two exhaustive retrospective cohorts of adult stroke and STEMI patients admitted to a care  
43 structure in the Aquitaine region whose data were entered into the CNV Registry between January 1,  
44 2019, and August 31, 2020.(23)

45  
46 The STEMI cohort comprised patients with recent (<24 h after symptom onset) STEMI managed in one  
47 of the six health territories in Aquitaine, each centered around an EMS, comprising 30 emergency units  
48 (EUs) and 11 catheterisation laboratories (nearly 1800 STEMIs are seen annually).

49  
50 The stroke cohort comprised patients with recent ischemic or hemorrhagic stroke (excluding transient  
51 ischemic attacks), diagnosed by brain imaging and validated by neurovascular physicians, that was  
52 managed in five health territories in Aquitaine, comprising 14 (7 with stroke units) of the 20 hospitals  
53 caring for more than 30 strokes per year in Aquitaine (nearly 5000 strokes are seen annually).

54  
55 The CNV Registry was approved by the French authority on data protection and met the regulatory  
56 requirements for the handling of patient information (file 2216283).

### Data collection

The CNV Registry contains information on patients' sociodemographic (age, gender, place of residence) and clinical [medical history, cardiovascular risk factors, stroke clinical severity (modified Rankin scale and National Institute of Health Stroke Score), stroke type (ischemic/hemorrhagic)] characteristics, use of care (calls to emergency services, FMC, symptom onset–care time), acute care management quality (times between key management steps, pre-hospital and hospital pathway types, treatment), and structural characteristics of care (care during on-call activity, calls to emergency services during care, hospital administrative status, FMC–catheterisation laboratory distance). Data are collected prospectively by physicians; consolidated retrospectively by clinical research assistants and then extracted from the hospital information system. Data from the two cohorts were integrated into one data warehouse enabling the reconstruction of the STEMI or stroke management pathway.(12)

### Outcomes

The primary endpoints were acute-care management times, which reflect the quality of care. For the STEMI cohort, we used the FMC–procedure time [delay (in minutes) between the FMC (mobile intensive care unit arrival or EU admission) and the start of a treatment procedure]. For the stroke cohort, we used the EU admission–imaging time [delay (in minutes) between EU admission and the start of the first imaging]. This selection of an interval that focused on the beginning of in-hospital stroke care was required due to the heterogeneity of the pre-hospital pathways and treatments applied.

### Exposure

Clinically vulnerable persons at risk of severe COVID-19 were those aged > 65 years; with neuro-cardiovascular history including previous STEMI, stroke, or transient ischemic attack; and/or with coronary artery disease history. For the STEMI cohort, the history of a PCI, a coronary artery bypass graft was also included.

Due to the lack of individual socioeconomic data, an ecological social deprivation score was assigned to each commune (the smallest administrative unit in France) of patients' residence using the 2015 deprivation index (Fdep15) to assess social vulnerability.(24) This index is associated strongly with mortality at all geographic scales. It served as the first dimension of a principal component analysis (weighted by population size) of four socioeconomic ecological variables: the percentage of high-school graduates  $\geq 15$  years old, median household income, percentage of blue-collar workers, and unemployment rate. Quintiles of the Fdep15 scores were computed for metropolitan France, whereby the first quintile (Q1) represented the least and the fifth quintile (Q5) the most disadvantaged communes.

### Statistical analyses

Analyses were performed separately for each cohort and exposure variable. Associations between clinical and social vulnerabilities' effects on care management times (introduced as continuous variables after logarithmic transformation) were analysed using multivariate linear mixed models (three each for stroke and STEMI), with random effects on hospital and health territories centered around single EMSs. Interactions on the time period were introduced. Three COVID-19 periods were defined according to the

1  
2  
3 dates of first hospital reorganisation (mid-February) and the termination of national lockdown (May 10,  
4 2020): pre-wave (January 1, 2019–February 9, 2020), per-wave (February 10–May 10, 2020), and post-  
5 wave (May 11–August 31, 2020). Inspired by the conceptual framework developed by the Health Care  
6 Quality Indicator Project of the Organization for Economic Cooperation and Development, we  
7 categorised determinants in four dimensions: patients, physicians, care organisations, and quality of  
8 care.<sup>(25)</sup> To develop the causal model, variables were classified into each of these dimensions and  
9 confounders were then identified by directed acyclic graphs (DAG; Supplementary Material 1). The  
10 relationships between vulnerabilities and care management times were quantified ( $\beta$ ) using the contrast  
11 method, with statistical significance defined as  $p < 0.05$ . The exponentials of the beta values [ $\exp(\beta)$ ],  
12 associated 95% confidence intervals (CIs), and percentage changes [ $1 - \exp(\beta)$ ] were then calculated. The  
13 statistical analyses were conducted using SAS 9.4.

### 21 **Patient and public involvement statement**

22 As members of the CNV registry scientific boards, patient representatives were involved in study  
23 conception, implementation, and dissemination; they validated data collection and analysis, and results  
24 diffusion. Dissemination of results was conducted on the CNV registry website, to the scientific boards,  
25 and to care-structure physicians.

26 This study is reported in accordance with the Strengthening the Reporting of Observational Studies in  
27 Epidemiology guidelines and is registered with ClinicalTrials.gov (NCT04979208).

## 33 **RESULTS**

### 35 **Sample characteristics**

36 The sample comprised 9218 patients (6436 with stroke, 2782 with STEMI); 54.9% of the stroke patients  
37 and 73.1% of the STEMI patients were male. Patients aged  $> 65$  years accounted for 81.3% and 50.1%  
38 of the stroke and STEMI patients, respectively. One-quarter of patients had neuro-cardiovascular history  
39 (stroke, 28.6%; STEMI, 20.5%). The distributions of the deprivation index quintiles in our sample,  
40 ordered from the most advantaged to the most disadvantaged, were 16.2%, 24.8%, 18.1%, 19.3%, and  
41 21.6% for stroke patients and 12.8%, 23.5%, 22.8%, 22.8%, and 18.1% for STEMI patients  
42 (Supplementary Material 2).

### 48 **Acute care management times**

#### 49 ***Stroke cohort***

50 In the pre-wave period, the median admission–imaging time was longer for stroke patients aged  $> 65$   
51 years than for younger patients (84 vs. 79 min) and for patients without than for those with neuro-  
52 cardiovascular history (86 vs. 76 min). Acute-care management times were longest for the most  
53 advantaged and most disadvantaged patients (both 88 min vs. 77–86 min for the other social deprivation  
54 categories; Table 1).

The median admission–imaging time was longer during the per-wave period than during the pre-wave period, regardless of age or neuro-cardiovascular history, but was shorter for the most advantaged patients (80 vs. 88 min). This time was shorter during the post-wave period than during the per-wave period, regardless of age, but was longer for the most advantaged patients (90 vs. 80 min).

**Table 1. Admission-to-imaging time according to vulnerabilities and COVID-19 periods - Stroke cohort (N=6436)**

|                                     | Global<br>(N=6436) |        |          | Pre-wave<br>(N=4140) |        |          | Per-wave<br>(N=1080) |        |          | Post-wave<br>(N=1216) |        |          |
|-------------------------------------|--------------------|--------|----------|----------------------|--------|----------|----------------------|--------|----------|-----------------------|--------|----------|
|                                     | n                  | Median | [IQR]    | n                    | Median | [IQR]    | n                    | Median | [IQR]    | n                     | Median | [IQR]    |
| <b>All patients</b>                 | 4819               | 86     | [47;194] | 3014                 | 83     | [45;201] | 889                  | 91     | [51;175] | 916                   | 88     | [52;191] |
| Missing value                       | 1617               |        |          | 1126                 |        |          | 191                  |        |          | 300                   |        |          |
| <b>Clinical vulnerability</b>       |                    |        |          |                      |        |          |                      |        |          |                       |        |          |
| <b>Age</b>                          | 4819               |        |          | 3014                 |        |          | 889                  |        |          | 916                   |        |          |
| [18-65 years[                       | 868                | 84     | [45;193] | 536                  | 79     | [43;208] | 157                  | 92     | [48;177] | 175                   | 85     | [45;174] |
| [65 years and older[                | 3951               | 86     | [48;194] | 2478                 | 84     | [45;199] | 732                  | 91     | [51;175] | 741                   | 88     | [52;197] |
| Missing value                       | 1617               |        |          | 1126                 |        |          | 191                  |        |          | 300                   |        |          |
| <b>Neuro-cardiovascular history</b> | 4819               |        |          | 3014                 |        |          | 889                  |        |          | 916                   |        |          |
| Absence                             | 3430               | 88     | [47;197] | 2128                 | 86     | [45;204] | 661                  | 93     | [51;177] | 641                   | 86     | [50;197] |
| Presence                            | 1389               | 83     | [48;184] | 886                  | 76     | [45;187] | 228                  | 87     | [49;173] | 275                   | 90     | [57;189] |
| Missing value                       | 1617               |        |          | 1126                 |        |          | 191                  |        |          | 300                   |        |          |
| <b>Social vulnerability</b>         |                    |        |          |                      |        |          |                      |        |          |                       |        |          |
| <b>Deprivation (Fdep15)</b>         | 4610               |        |          | 2821                 |        |          | 884                  |        |          | 905                   |        |          |
| Most advantaged                     | 743                | 87     | [47;235] | 469                  | 88     | [46;240] | 145                  | 80     | [44;202] | 129                   | 90     | [54;239] |
| Advantaged                          | 1107               | 84     | [45;206] | 637                  | 77     | [42;216] | 235                  | 97     | [51;181] | 235                   | 85     | [48;202] |
| Intermediate                        | 831                | 87     | [48;179] | 492                  | 83     | [46;189] | 168                  | 92     | [53;153] | 171                   | 94     | [54;188] |
| Disadvantaged                       | 903                | 86     | [47;183] | 568                  | 86     | [46;186] | 154                  | 86     | [47;170] | 181                   | 86     | [51;179] |
| Most disadvantaged                  | 1026               | 89     | [52;192] | 655                  | 88     | [51;198] | 182                  | 95     | [55;175] | 189                   | 82     | [52;148] |
| Missing value                       | 1826               |        |          | 1319                 |        |          | 196                  |        |          | 311                   |        |          |

*IQR=interquartile range*

### **STEMI cohort**

In the pre-wave period, the median FMC–procedure time was longer for STEMI patients aged > 65 years than for younger patients (103 vs. 96 min). Its length increased with the degree of disadvantage (from 82 min for the most advantaged to 129 min for the most disadvantaged patients; Table 2).

The median FMC–procedure time was slightly shorter during the per-wave period than during the pre-wave period, regardless of age or neuro-cardiovascular history, but was longer for the most advantaged patients (92 vs. 82 min). This time was longer during the post-wave period than during the per-wave period, especially for elderly patients (117 vs. 101 min), those with neuro-cardiovascular history (112 vs. 89 min), and those most advantaged (119 vs. 92 min).

**Table 2. FMC-to-procedure time according to vulnerabilities and COVID-19 periods - STEMI cohort (N=2782)**

|                                     | Global<br>(N=2782) |        |          | Pre-wave<br>(N=1868) |        |          | Per-wave<br>(N=407) |        |          | Post-wave<br>(N=507) |        |          |
|-------------------------------------|--------------------|--------|----------|----------------------|--------|----------|---------------------|--------|----------|----------------------|--------|----------|
|                                     | n                  | Median | [IQR]    | n                    | Median | [IQR]    | n                   | Median | [IQR]    | n                    | Median | [IQR]    |
| <b>All patients</b>                 | 2364               | 99     | [71;157] | 1577                 | 100    | [71;158] | 353                 | 95     | [69;152] | 434                  | 102    | [71;153] |
| Missing value                       | 418                |        |          | 291                  |        |          | 54                  |        |          | 73                   |        |          |
| <b>Clinical vulnerability</b>       |                    |        |          |                      |        |          |                     |        |          |                      |        |          |
| <b>Age</b>                          | 2364               |        |          | 1577                 |        |          | 353                 |        |          | 434                  |        |          |
| [18-65 years[                       | 1207               | 95     | [69;147] | 794                  | 96     | [69;152] | 175                 | 93     | [68;134] | 238                  | 94     | [69;134] |
| [65 years and older[                | 1157               | 105    | [73;173] | 783                  | 103    | [74;169] | 178                 | 101    | [70;190] | 196                  | 117    | [74;167] |
| Missing value                       | 418                |        |          | 291                  |        |          | 54                  |        |          | 73                   |        |          |
| <b>Neuro-cardiovascular history</b> | 2364               |        |          | 1577                 |        |          | 353                 |        |          | 434                  |        |          |
| Absence                             | 1699               | 98     | [71;156] | 1115                 | 99     | [71;157] | 267                 | 97     | [70;157] | 317                  | 96     | [70;149] |
| Presence                            | 468                | 101    | [70;159] | 318                  | 102    | [72;156] | 67                  | 89     | [61;135] | 83                   | 112    | [74;169] |
| Unknown                             | 197                | 98     | [74;161] | 144                  | 97     | [73;180] | 19                  | 97     | [81;134] | 34                   | 118    | [78;154] |
| Missing value                       | 418                |        |          | 291                  |        |          | 54                  |        |          | 73                   |        |          |
| <b>Social vulnerability</b>         |                    |        |          |                      |        |          |                     |        |          |                      |        |          |
| <b>Deprivation (Fdep15)</b>         | 2343               |        |          | 1565                 |        |          | 351                 |        |          | 427                  |        |          |
| Most advantaged                     | 304                | 90     | [64;152] | 203                  | 82     | [63;149] | 48                  | 92     | [62;127] | 53                   | 119    | [79;177] |
| Advantaged                          | 551                | 91     | [66;145] | 350                  | 92     | [68;139] | 90                  | 93     | [62;162] | 111                  | 89     | [65;150] |
| Intermediate                        | 538                | 95     | [70;150] | 378                  | 97     | [69;156] | 71                  | 91     | [68;157] | 89                   | 89     | [72;129] |
| Disadvantaged                       | 536                | 102    | [73;150] | 353                  | 101    | [75;154] | 82                  | 94     | [70;140] | 101                  | 106    | [73;151] |
| Most disadvantaged                  | 414                | 124    | [86;204] | 281                  | 129    | [85;215] | 60                  | 120    | [90;198] | 73                   | 122    | [93;180] |
| Missing value                       | 439                |        |          | 303                  |        |          | 56                  |        |          | 80                   |        |          |

*IQR=interquartile range*

## Effects of the COVID-19 first wave

### *Stroke cohort models*

The final stroke models showed no significant association among advanced age [ $n = 4819$ ,  $\exp(\beta) = 1.08$ , 95% CI 1.00–1.16,  $p = 0.07$ ], neuro-cardiovascular history [ $n = 4610$ ,  $\exp(\beta) = 0.97$ , 95% CI 0.91–1.04,  $p = 0.44$ ], deprivation ( $n = 4606$ ,  $p = 0.30$ ), and the EU admission–imaging time, and no interaction with the COVID-19 period (age,  $p = 0.81$ ; neuro-cardiovascular history,  $p = 0.34$ ; deprivation,  $p = 0.95$ ; Figure 1).

### *STEMI cohort models*

Advanced age was associated with a 15% increase in the FMC–procedure time [ $n = 2364$ ,  $\exp(\beta) = 1.15$ , 95% CI 1.07–1.24,  $p < 0.001$ ]. No significant association was noted between patients' neuro-cardiovascular history and the FMC–procedure time [ $n = 2167$ ,  $\exp(\beta) = 1.08$ , 95% CI 0.98–1.19,  $p = 0.14$ ]. Compared with those in the other four quintiles, FMC–procedure times were 15–22% longer for patients in the most disadvantaged quintile ( $n = 2343$ ,  $p = 0.003$ ). No significant COVID-19 period interaction affected the relationships between the vulnerabilities studied and the FMC–procedure time (age,  $p = 0.54$ ; neuro-cardiovascular history,  $p = 0.70$ ; deprivation,  $p = 0.64$ ; Figure 2).

## DISCUSSION

### Main results

This analysis of the healthcare pathways for STEMI and stroke patients included in the CNV Registry showed that care management times for socially or clinically vulnerable patients did not worsen during the first wave of the COVID-19 pandemic, despite changes in the access to and use and organisation of care. Nonetheless, regardless of the COVID-19 period, acute-care management times were longer for elderly and the most disadvantaged STEMI patients.

### Effects of the COVID-19 first wave

Our results are concordant with those of a study conducted in Italy, which revealed no educational or deprivation gradient for cardiovascular acute-care management times.<sup>(22)</sup> Several factors can explain the resilience of stroke and STEMI care pathways for vulnerable populations.

First, STEMI and stroke networks in France are structured as well-defined, organised, and dedicated pathways. Highly structured patient-centered clinical pathways improve the quality of care for chronic and acute conditions with predictable trajectories.<sup>(26,27)</sup> Guidelines and national stroke and STEMI improvement programs recommend the implementation of such structured pathways, which include close collaborations between healthcare professionals and patient orientation to the EMS system and specialised technical platforms. A study of the impacts of changes in the use of care and implementation of hospital reorganisation spurred by the COVID-19 pandemic on acute management times for stroke and STEMI revealed no deep alteration of the emergency pathway construct.<sup>(12)</sup> Socially and/or clinically vulnerable populations have also benefited from the resilience of the STEMI and stroke pathways.

Second, in the particular context of the first COVID-19 wave, the mass media widely relayed information from health institutions. The whole population was worried and very concerned about its health. Lockdown measures made people more available, and routinely exposed, to mainstream media that were highly focused on the pandemic and health messages. These factors are associated with a greater likelihood of the adoption of recommended prevention practices.<sup>(28)</sup> Thus, broad health-related media coverage may have had a positive influence on health literacy for the whole population, which may have positively influenced the use of the healthcare system.<sup>(29)</sup>

Third, the EMS was identified as the first contact to limit exposure and regulate urgent calls during the first COVID-19 wave in France. The media relayed this information. French hospitals increased regulation capacities to face the rise in EMS calls, in an attempt to preserve access to care and the capacity to handle vital emergencies for the entire population.<sup>(30)</sup>

Fourth, France adopted a specific strategy in March 2020 to support the economy, companies, and jobs through measures that include financial support for disadvantaged populations, salary preservation, the prohibition of layoffs, and housing assistance.<sup>(31)</sup> Associated with universal healthcare coverage, these actions may have contributed to mitigate the social consequences of the pandemic.

### Global effects

Several studies, including the present work, have shown that acute-care management times are longer for elderly patients and socially vulnerable STEMI patients.(32–34) Regarding age, greater initial clinical severity, atypical symptoms, and a longer delay in admission may explain these findings.(33) However, findings with respect to socioeconomic status do not converge. Biswas et al. (32) found that the median time to reperfusion in Australia, a country with universal healthcare, between 2005 and 2015 was 4 min longer for lower socioeconomic quintiles than for the highest quintile. Vasaiwala et al. (34) found a direct correlation between income levels in the United States and the proportion of patients meeting the guideline-recommended door–balloon time. In contrast, Heo et al. (35) found no association between the educational level and door–balloon time in Korea. None of these studies involved control for the confounders. Additional dedicated analyses of the relationship between socioeconomic status and acute-care management time are needed, especially for elderly patients with accumulated comorbid factors due to their disadvantaged status.

We found no alteration in the acute-care management time for elderly and socially vulnerable stroke patients. This may be explained by our examination of the EU admission–imaging time focused on the beginning of in-hospital care. Unlike the STEMI pathway, this time involves such a small portion of stroke patients’ pathways that it could have been difficult to detect an effect. Regarding age, half of the STEMI patients in our sample were aged > 65 years. The proportion of elderly stroke patients was 81%, which made it difficult to demonstrate an effect. To our knowledge, only one study, conducted in England, has revealed an association between older age and a longer admission–computerised tomography time.(36) Few studies have involved the exploration of acute stroke management times according to socioeconomic status, with contrasting results explained by the specificities of healthcare systems.(3,37) In a study conducted in England, socially vulnerable patients were less likely to undergo high-quality recommended processes and more likely to undergo early supported discharge.(3) A study conducted in Sweden showed that university-educated patients were more likely to be treated than were less-educated patients.(37)

Regardless of the COVID-19 period, we found no significant influence of patients’ neuro-cardiovascular history on acute-care management times, consistent with reported findings for STEMI patients.(38) To our knowledge, no other study has evaluated this relationship for stroke care.

### Strengths and weaknesses

Our study, one of the first to examine the effects of the COVID-19 crisis on the quality of care for STEMI and stroke patients in Europe with consideration of health and social inequalities, involved the parallel analysis of two high-quality databases containing data on large numbers of stroke and STEMI patients managed in a large panel of care structures in the Aquitaine region.

The sample is representative of stroke and STEMI patients managed in hospitals. However, our study has some limitations, particularly with regard to the population. The study area was limited to the Aquitaine region, one of the regions least affected by the first wave of the COVID-19 pandemic.(39)

1  
2  
3 This situation could have led to the exertion of less pressure on health services (especially the EMS,  
4 STEMI, and stroke network). It would be interesting to repeat the study in another region, or in another  
5 country more affected by the pandemic, to test the external validity of the results.  
6

7  
8 Moreover, patients who did not enter the healthcare system because they had died or did not benefit  
9 from hospital care, as well as STEMI patients with symptoms for >24 h, were not included. The  
10 exclusion of these patients may have generated selection bias, and prevented us from quantifying the  
11 phenomenon of healthcare system avoidance that is supposed to have been more frequent among socially  
12 and/or clinically vulnerable patients during the COVID-19 crisis; it also entails the risk that increases in  
13 the delay to use of care were underestimated for some patient subgroups.(40)  
14

15  
16 Our explanatory analyses yield robust results, with the inclusion of appropriate confounding variables  
17 identified by the DAG method. The large panel of data collected enabled the integration of a wide variety  
18 of confounders, including clinical characteristics and socio-geographical factors.  
19

20  
21 Given the lack of individual-level socioeconomic data in the CNV Registry, which prevented the  
22 assignment of social determinants for each patient, we used a residence area-based measure, which is a  
23 major limitation of our study. However, we determined deprivation indices using a validated tool that  
24 has been used in many studies conducted in France.(24) Moreover, the socio-ecological measure of  
25 deprivation tends to underestimate social inequalities observed using individual data; thus, caution is  
26 advised when attributing group-level estimates to individuals.(6) Additional limitations of this study  
27 include our inability to include all clinical risk factors of severe COVID-19 and information about  
28 patients' educational levels, individual resources, and social support to further explore their  
29 precariousness and health literacy. The COVID-19 pandemic may have had a greater impact on the  
30 access to and quality of care for the most precarious individuals.  
31

32  
33 A major methodological issue of this study is that we defined the per-wave period according to the  
34 implementation of healthcare reorganisation and transformation of societal functioning to fight the  
35 COVID-19 pandemic.(12) We began the per-wave period at the time of the first hospital reorganisation  
36 implementation and ended it at the time of lockdown lifting. Although data for the CNV Registry are  
37 collected continuously, we terminated the follow-up period at the end of August 2020 to enable the  
38 timely reporting of results.  
39

40  
41 Finally, we did not explore short- or long-term outcomes such as morbidity, mortality, disability, or  
42 rehospitalisation after initial hospitalisation for STEMI or stroke, for which a wide range of  
43 socioeconomic disparities exist, in the context of the COVID-19 pandemic.(3,40) This will be a key  
44 focus of our ongoing research.  
45

## 46 **Conclusions**

47  
48 The first wave of the COVID-19 pandemic induced no deep change in management times for the most  
49 socially and/or clinically vulnerable stroke and STEMI patients. Pre-existing inequalities in care  
50 management times were neither aggravated nor reduced by changes in the use of care or implementation  
51 of hospital reorganisation spurred by the pandemic. These encouraging results may be explained by the  
52  
53  
54  
55  
56  
57  
58  
59  
60



1  
2  
3  
4  
5  
6  
7  
8  
9  
10  
11  
12  
13  
14  
15  
16  
17  
18  
19  
20  
21  
22  
23  
24  
25  
26  
27  
28  
29  
30  
31  
32  
33  
34  
35  
36  
37  
38  
39  
40  
41  
42  
43  
44  
45  
46  
47  
48  
49  
50  
51  
52  
53  
54  
55  
56  
57  
58  
59  
60

well-structured STEMI and stroke networks in France and the reorganisation of the healthcare structure to preserve access and the capacity to care for vital emergencies using the EMS.

For peer review only

1  
2  
3  
4  
5  
6  
7  
8  
9  
10  
11  
12  
13  
14  
15  
16  
17  
18  
19

- **Figure Legend/Caption**

20  
21  
22

**Figure 1. Estimation of each clinical and social factor (95% confidence interval) on emergency unit admission-to-imaging time.**

Estimated overall effects expressed as  $\exp(\beta)$  with 95% CI; results of multivariate linear regression mixed models; variable to be explained:  $Y = \log(\text{emergency unit admission-to-imaging time})$ ; (A) results adjusted on period and gender; (B) cardiovascular history was a history of stroke, transient ischemic attack, coronary artery disease, or myocardial infarction; results adjusted on period, age, gender, diabetes and smoking as risk factors, deprivation index; (C) the reference modality for the deprivation index Fdep15 in five categories was “most disadvantaged”; results adjusted on period, age, gender, country of birth, urbanicity of residence.

23  
24  
25  
26  
27  
28  
29  
30  
31  
32  
33  
34  
35

**Figure 2. Estimation of each clinical and social factor (95% confidence interval) on FMC-to-procedure time.**

Estimated overall effects expressed as  $\exp(\beta)$  with 95% CI; results of multivariate linear regression mixed models; variable to be explained:  $Y = \log(\text{FMC-to-procedure time})$ ; (A) results adjusted on period and gender; (B) cardiovascular history was a history of stroke, transient ischemic attack, coronary artery disease, or myocardial infarction; results adjusted on period, age, gender, diabetes, hypertension, dyslipidemia, obesity and smoking as risk factors; (C) the reference modality for the deprivation index Fdep15 in five categories was “most disadvantaged”; results adjusted on period, age, gender, country of birth, urbanicity of residence.

36  
37  
38  
39  
40  
41  
42  
43  
44  
45  
46  
47  
48  
49  
50  
51  
52  
53  
54  
55

- **Data sharing statement**

Deidentified participant data will be available upon reasonable request. Proposals may be submitted to the corresponding author. Data requestors will need to sign a data access agreement

- **Patient consent for publication**

Not applicable.

- **Ethics statements**

According to French authority on data protection “Commission Nationale Informatique et Libertés”, in the category of studies not involving humans based on secondary use of health data, the CNV registry met regulatory requirements for patient information and do not require a patient consent form.

**Ethics approval**

Not applicable

- **Authors' contributions**

56  
57  
58  
59  
60

EL, FF, SD, FSa and FSe were responsible for the study concept and design. EL and FF conducted the literature review. EL and FSe had full access to all of the data and takes responsibility for their integrity and accuracy. SD and SMH performed the statistical analysis. FSa, EL, SD, FF, FSe, SV, LC, PC, FR,

1  
2  
3 IS, CP interpreted the data. EL, FF, SV, FSa and SD wrote the manuscript. FSe, LC, PC, FR, IS and CP  
4 critically reviewed the manuscript.  
5

6  
7 • **Competing interests statement**

8 The authors declare that they have no competing interests with this study.  
9

10 • **Funding statement**

11 This work was supported by "Alliance Tous unis contre le virus", which includes the "Fondation de  
12 France", the "AP-HP" and the "Institut Pasteur" grant number 00107870 and the "Nouvelle-Aquitaine  
13 Regional Health Agency".  
14

15 • **Acknowledgments**

16 We thank funders of the project ("Alliance Tous unis contre le virus", which includes the "Fondation de  
17 France", the "AP-HP" and the "Institut Pasteur"), of the CNV registry ("Nouvelle-Aquitaine Regional  
18 Health Agency"), the CNV registry team (Charlotte Boureau, Mathilde Borg, Sandrine Domecq, Céline  
19 Dupuis, Florian Gilbert, Cristelle Gill, Leslie Larco, Jean-Pierre Legrand, Mélanie Maugeais, Sahal  
20 Miganeh-Hadi, Corinne Perez, Olivia Rick, Floriane Sevin), Julien Asselineau, Vincent Bouteloup,  
21 Moufid Hajjar, Marion Kret, Vincent Thevenet, Rodolphe Thiebaut, the AVICOVID group (Dr Ansart  
22 Emma, Dr Argacha Isabelle, Dr Baha Leila, Dr Bakpa Djoumana, Dr Bannier Stéphanie, Dr Banos Jean-  
23 Luc, Dr Bartou Christine, Dr Bataille Bertrand, Dr Berge Jérôme, Dr Bernady Patricia, Dr Bidian Sorina,  
24 Dr Bordier Philippe, Dr Casenave Philippe, Dr Casteigt Francois, Dr Chartroule Véronique, Dr  
25 Chazalon Cécile, Dr Cherhabil Nidhal, Dr Claveries Paul, Pr Combes Xavier, Dr Coustere Jean-baptiste,  
26 Dr Dan Maria, Dr Darraillans Didier, Dr Delarche Nicolas, Dr Delonglee Virginie, Dr Demasles  
27 Stéphanie, Dr Eclancher Anncy, Dr Ellie Emmanuel, Dr Fabre Jean, Dr Faucheux Jean-Marc, Dr  
28 Ferraton Lucie, Dr Fort Pierre-Arnaud, Dr Fournier Pierre, Dr Goulois Nathalie, Dr Goze-Dupuy  
29 Catherine, Dr Hassan Akil, Dr Heydel Virginie, Dr Higue David, Dr Hostyn Véronique, Dr Hubrecht  
30 Régis, Dr Jarnier Philippe, Dr Karsenty Bernard, Dr Lacrouts Marc, Dr Laplace Guillaume, Dr  
31 Larnaudie Bernard, Dr Lavocat Hélène, Dr Leca Radu Eléna, Dr Lefevre Brice, Dr Leymarie Jean-  
32 Louis, Dr Leyral Hervé, Dr Liepa Marie-Pierre, Dr Lorendeau Jean-Paul, Dr Lucas Ludovic, Dr Maillard  
33 Laurent, Dr Maisonnave Vincent, Dr Marnat Gaultier, Dr Marque Nicolas, Dr Martinez Miquel, Dr  
34 Mostefai Yousra, Dr Ngounou Fogue Chancel, Dr Nocon Claire, Dr Ondze Basile, Dr Orcival François,  
35 Dr Papin Jérémy, Dr Péron Julie, Dr Perron Jean-Marie, Dr Py Emmanuel, Dr Scouarnec Catherine, Dr  
36 Dr Seignolles Gaëlle, Dr Senis Frédéric, Dr Tahon Bertrand, Dr Tarak Mokni, Dr Tidahy Eliane, Dr  
37 Touchard Philippe, Dr Trogoff Bruno, Dr Verhoeven Luc, Dr Wong So Laurent) and all healthcare  
38 professionals participating in the CNV registry.  
39  
40  
41  
42  
43  
44  
45  
46  
47  
48  
49  
50  
51  
52  
53  
54  
55  
56  
57  
58  
59  
60

## REFERENCES

1. Neumann FJ, Sousa-Uva M, Ahlsson A, Alfonso F, Banning AP, Benedetto U, et al. 2018 ESC/EACTS Guidelines on myocardial revascularization. *EuroIntervention*. 20 févr 2019;14(14):1435-534.
2. Terkelsen CJ, Sørensen JT, Maeng M, Jensen LO, Tilsted HH, Trautner S, et al. System delay and mortality among patients with STEMI treated with primary percutaneous coronary intervention. *JAMA*. 18 août 2010;304(7):763-71.
3. Bray BD, Paley L, Hoffman A, James M, Gompertz P, Wolfe CDA, et al. Socioeconomic disparities in first stroke incidence, quality of care, and survival: a nationwide registry-based cohort study of 44 million adults in England. *The Lancet Public Health*. avr 2018;3(4):e185-93.
4. Simoni AH, Frydenlund J, Kragholm KH, Bøggild H, Jensen SE, Johnsen SP. Socioeconomic inequity in incidence, outcomes and care for acute coronary syndrome: A systematic review. *International Journal of Cardiology*. juin 2022;356:19-29.
5. Schultz WM, Kelli HM, Lisko JC, Varghese T, Shen J, Sandesara P, et al. Socioeconomic Status and Cardiovascular Outcomes. *Circulation*. 15 mai 2018;137(20):2166-78.
6. Schröder SL, Richter M, Schröder J, Frantz S, Fink A. Socioeconomic inequalities in access to treatment for coronary heart disease: A systematic review. *Int J Cardiol*. 15 sept 2016;219:70-8.
7. Kucharska-Newton AM, Harald K, Rosamond WD, Rose KM, Rea TD, Salomaa V. Socioeconomic indicators and the risk of acute coronary heart disease events: comparison of population-based data from the United States and Finland. *Ann Epidemiol*. août 2011;21(8):572-9.
8. Javed Z, Haisum Maqsood M, Yahya T, Amin Z, Acquah I, Valero-Elizondo J, et al. Race, Racism, and Cardiovascular Health: Applying a Social Determinants of Health Framework to Racial/Ethnic Disparities in Cardiovascular Disease. *Circ Cardiovasc Qual Outcomes*. janv 2022;15(1):e007917.
9. Kiss P, Carcel C, Hockham C, Peters SAE. The impact of the COVID-19 pandemic on the care and management of patients with acute cardiovascular disease: a systematic review. *Eur Heart J Qual Care Clin Outcomes*. 25 janv 2021;7(1):18-27.
10. Chew NW, Ow ZGW, Teo VXY, Heng RRY, Ng CH, Lee CH, et al. The Global Impact of the COVID-19 Pandemic on STEMI care: A Systematic Review and Meta-Analysis. *Can J Cardiol*. 10 avr 2021;S0828-282X(21)00179-3.
11. Zhao J, Li H, Kung D, Fisher M, Shen Y, Liu R. Impact of the COVID-19 Epidemic on Stroke Care and Potential Solutions. *Stroke*. juill 2020;51(7):1996-2001.
12. Lesaine E, Francis-Oliviero F, Domecq S, Bijon M, Cetrin L, Coste P, et al. Effects of healthcare system transformations spurred by the COVID-19 pandemic on management of stroke and STEMI: a registry-based cohort study in France. *BMJ Open*. 1 sept 2022;12(9):e061025.

13. Siegler JE, Zha AM, Czap AL, Ortega-Gutierrez S, Farooqui M, Liebeskind DS, et al. Influence of the COVID-19 Pandemic on Treatment Times for Acute Ischemic Stroke. *Stroke*. janv 2021;52(1):40-7.
14. Bambra C, Riordan R, Ford J, Matthews F. The COVID-19 pandemic and health inequalities. *J Epidemiol Community Health*. 13 juin 2020;jech-2020-214401.
15. Khanijahani A, Iezadi S, Gholipour K, Azami-Aghdash S, Naghibi D. A systematic review of racial/ethnic and socioeconomic disparities in COVID-19. *International Journal for Equity in Health*. 24 nov 2021;20(1):248.
16. Horton R. Offline: COVID-19 is not a pandemic. *The Lancet*. sept 2020;396(10255):874.
17. Magesh S, John D, Li WT, Li Y, Mattingly-app A, Jain S, et al. Disparities in COVID-19 Outcomes by Race, Ethnicity, and Socioeconomic Status: A Systematic Review and Meta-analysis. *JAMA Network Open*. 11 nov 2021;4(11):e2134147.
18. Green H, Fernandez R, MacPhail C. The social determinants of health and health outcomes among adults during the COVID-19 pandemic: A systematic review. *Public Health Nurs*. nov 2021;38(6):942-52.
19. Vandentorren S, Smaïli S, Chatignoux E, Maurel M, Alleaume C, Neufcourt L, et al. The effect of social deprivation on the dynamic of SARS-CoV-2 infection in France: a population-based analysis. *The Lancet Public Health*. 1 mars 2022;7(3):e240-9.
20. Chauvin F. Actualisation de l'avis relatif aux personnes à risque de forme grave de Covid-19 et aux mesures barrières spécifiques à ces publics [Internet]. Haut Conseil de la santé publique; 2020 avr [cité 18 mai 2022] p. 10. Disponible sur: <https://www.hcsp.fr/explore.cgi/avisrapportsdomaine?clefr=807>
21. Naylor-Wardle J, Rowland B, Kunadian V. Socioeconomic status and cardiovascular health in the COVID-19 pandemic. *Heart*. 1 mars 2021;107(5):358-65.
22. Di Girolamo C, Gnavi R, Landriscina T, Forni S, Falcone M, Calandrini E, et al. Indirect impact of the COVID-19 pandemic and its containment measures on social inequalities in hospital utilisation in Italy. *J Epidemiol Community Health*. 12 mai 2022;jech-2021-218452.
23. Lesaine E, Saillour-Glenisson F, Leymarie JL, Jamet I, Fernandez L, Perez C, et al. The ACIRA Registry: A Regional Tool to Improve the Healthcare Pathway for Patients Undergoing Percutaneous Coronary Interventions and Coronary Angiographies in the French Aquitaine Region: Study Design and First Results. *Crit Pathw Cardiol*. mars 2020;19(1):1-8.
24. Rey G, Jouglu E, Fouillet A, Hémon D. Ecological association between a deprivation index and mortality in France over the period 1997 – 2001: variations with spatial scale, degree of urbanicity, age, gender and cause of death. *BMC Public Health*. 22 janv 2009;9:33.
25. Arah OA, Westert GP, Hurst J, Klazinga NS. A conceptual framework for the OECD Health Care Quality Indicators Project. *Int J Qual Health Care*. sept 2006;18 Suppl 1:5-13.

- 1
- 2
- 3 26. Allen D, Gillen E, Rixson L. Systematic review of the effectiveness of integrated care pathways:  
4 what works, for whom, in which circumstances? *Int J Evid Based Healthc*. juin 2009;7(2):61-74.
- 5
- 6 27. Trimarchi L, Caruso R, Magon G, Odone A, Arrigoni C. Clinical pathways and patient-related  
7 outcomes in hospital-based settings: a systematic review and meta-analysis of randomized  
8 controlled trials. *Acta Biomed*. 9 févr 2021;92(1):e2021093.
- 9
- 10 28. Lin L, Savoia E, Agboola F, Viswanath K. What have we learned about communication  
11 inequalities during the H1N1 pandemic: a systematic review of the literature. *BMC Public*  
12 *Health*. 21 mai 2014;14:484.
- 13
- 14 29. Peltzer S, Hellstern M, Genske A, Jünger S, Woopen C, Albus C. Health literacy in persons at  
15 risk of and patients with coronary heart disease: A systematic review. *Soc Sci Med*. janv  
16 2020;245:112711.
- 17
- 18 30. Guide méthodologique « préparation à la phase épidémique de COVID-19 des établissements de  
19 santé, de la médecine de ville et des établissements et services médico-sociaux » du 16 mars  
20 2020 [Internet]. 2020 mars [cité 24 juin 2022] p. 47. Disponible sur: [https://www.nouvelle-](https://www.nouvelle-aquitaine.ars.sante.fr/guide-methodologique-preparation-la-phase-epidémique-de-covid-19-des-etablissements-de-sante-de-la)  
21 [aquitaine.ars.sante.fr/guide-methodologique-preparation-la-phase-epidémique-de-covid-19-des-](https://www.nouvelle-aquitaine.ars.sante.fr/guide-methodologique-preparation-la-phase-epidémique-de-covid-19-des-etablissements-de-sante-de-la)  
22 [etablissements-de-sante-de-la](https://www.nouvelle-aquitaine.ars.sante.fr/guide-methodologique-preparation-la-phase-epidémique-de-covid-19-des-etablissements-de-sante-de-la)
- 23
- 24 31. Math A. Quoi qu'il en coûte. Des mesures incomparables pour faire face aux conséquences  
25 économiques de la pandémie ? - IRES. *Chronique internationale de l'IRES*. 2021;(176):8-31.
- 26
- 27 32. Biswas S, Andrianopoulos N, Duffy SJ, Lefkovits J, Brennan A, Walton A, et al. Impact of  
28 Socioeconomic Status on Clinical Outcomes in Patients With ST-Segment-Elevation Myocardial  
29 Infarction. *Circ Cardiovasc Qual Outcomes*. janv 2019;12(1):e004979.
- 30
- 31 33. Nguyen HL, Saczynski JS, Gore JM, Goldberg RJ. Age and Sex Differences in Duration of Pre-  
32 hospital Delay in Patients with Acute Myocardial Infarction: A Systematic Review. *Circ*  
33 *Cardiovasc Qual Outcomes*. janv 2010;3(1):82-92.
- 34
- 35 34. Vasaiwala S, Vidovich M. Impact of socioeconomic status on guideline-recommended care for  
36 ST-elevation myocardial infarction in the United States. *Int J Cardiol*. 3 sept 2010;143(3):424-5.
- 37
- 38 35. Heo JY, Hong KJ, Shin SD, Song KJ, Ro YS. Association of educational level with delay of  
39 prehospital care before reperfusion in STEMI. *Am J Emerg Med*. déc 2015;33(12):1760-9.
- 40
- 41 36. Myint PK, Kidd AC, Kwok CS, Musgrave SD, Redmayne O, Metcalf AK, et al. Time to  
42 Computerized Tomography Scan, Age, and Mortality in Acute Stroke. *J Stroke Cerebrovasc Dis*.  
43 déc 2016;25(12):3005-12.
- 44
- 45 37. Stecksén A, Glader EL, Asplund K, Norrving B, Eriksson M. Education Level and Inequalities  
46 in Stroke Reperfusion Therapy. *Stroke*. sept 2014;45(9):2762-8.
- 47
- 48 38. Feng L, Li M, Xie W, Zhang A, Lei L, Li X, et al. Prehospital and in-hospital delays to care and  
49 associated factors in patients with STEMI: an observational study in 101 non-PCI hospitals in  
50 China. *BMJ Open*. 10 nov 2019;9(11):e031918.
- 51
- 52
- 53
- 54
- 55
- 56
- 57
- 58
- 59
- 60

- 1  
2  
3 39. Olié V, Carcaillon-Bentata L, Thiam MM, Haeghebaert S, Caserio-Schönemann C. Emergency  
4 department admissions for myocardial infarction and stroke in France during the first wave of  
5 the COVID-19 pandemic: National temporal trends and regional disparities. Archives of  
6 Cardiovascular Diseases. avr 2021;114(5):371-80.  
7  
8  
9 40. Andersen J, Strandberg-Larsen K, Gerds T, Gislason G, Torp-Pedersen C, Blanche P, et al. Risk  
10 of major cardiovascular events according to educational level before and after the initial  
11 COVID-19 public lockdown: a nationwide study. J Epidemiol Community Health. févr  
12 2021;jech-2020-215133.  
13  
14  
15  
16  
17  
18  
19  
20  
21  
22  
23  
24  
25  
26  
27  
28  
29  
30  
31  
32  
33  
34  
35  
36  
37  
38  
39  
40  
41  
42  
43  
44  
45  
46  
47  
48  
49  
50  
51  
52  
53  
54  
55  
56  
57  
58  
59  
60

For peer review only

**Stroke Cohort**

(A) Model "age over 65 years old" (N=4,819)

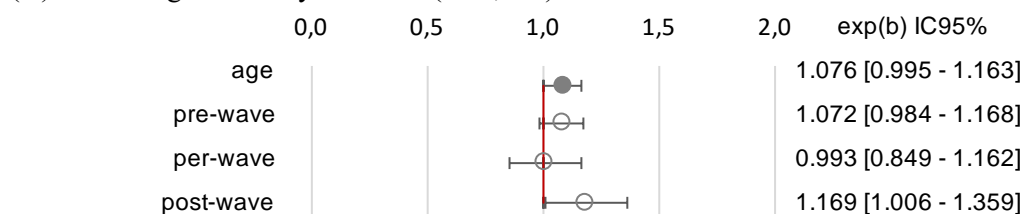

(B) Model "cardiovascular history" (N=4,610)

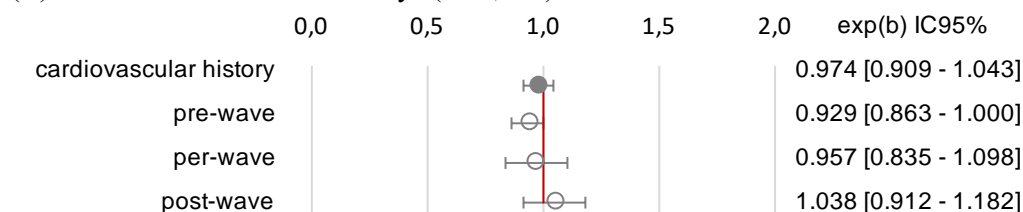

(C) Model "deprivation index - Fdep15" (N=4,606)

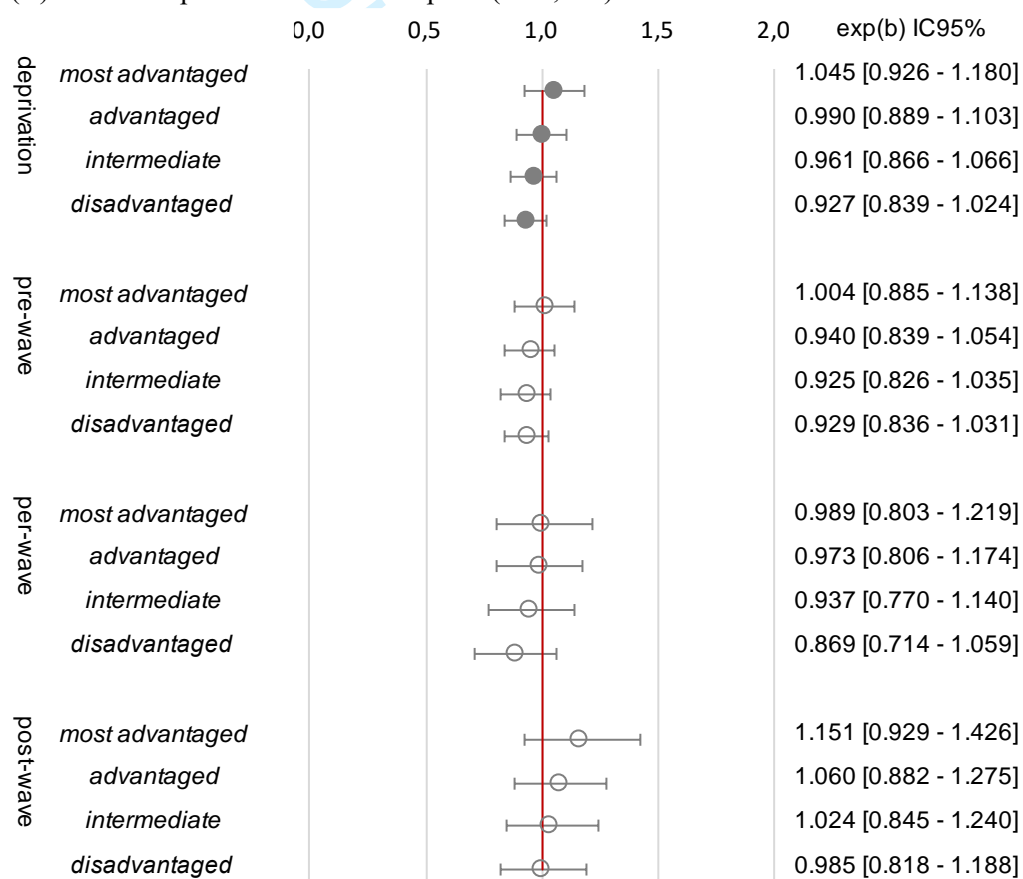

**Figure 1. Estimation of each clinical and social factor (95% confidence interval) on emergency unit admission-to-imaging time.**

Estimated overall effects expressed as  $\exp(\beta)$  with 95% CI; results of multivariate linear regression mixed models; variable to be explained:  $Y = \log(\text{emergency unit admission-to-imaging time})$ ; (A) results adjusted on period and gender; (B) cardiovascular history was a history of stroke, transient ischemic attack, coronary artery disease, or myocardial infarction; results adjusted on period, age, gender, diabetes and smoking as risk factors, deprivation index; (C) the reference modality for the deprivation index Fdep15 in five categories was "most disadvantaged"; results adjusted on period, age, gender, country of birth, urbanicity of residence.



**STEMI Cohort****(A) Model "age over 65 years old" (N=2,364)**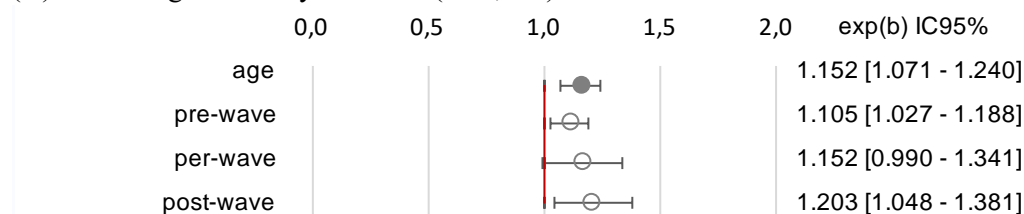**(B) Model "cardiovascular history" (N=2,167)**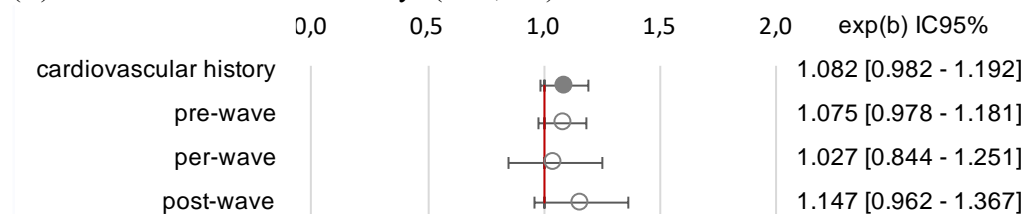**(C) Model "deprivation index - Fdep15" (N=2,343)**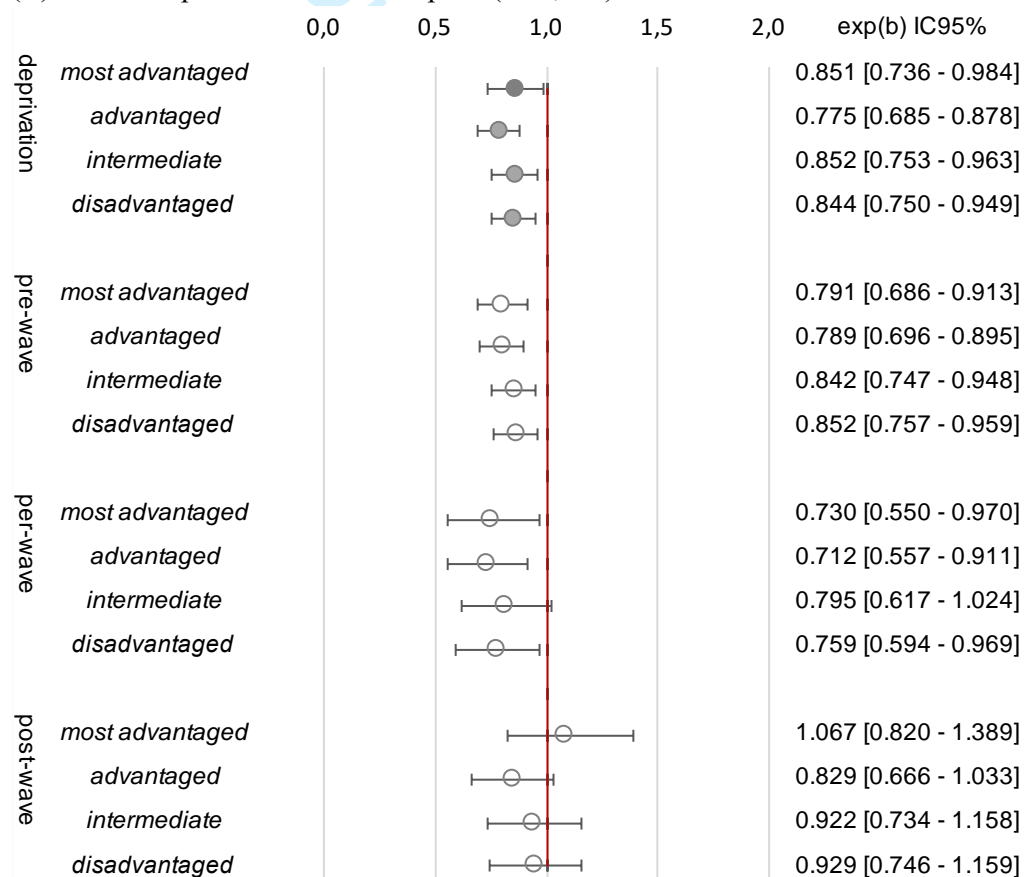**Figure 2. Estimation of each clinical and social factor (95% confidence interval) on FMC-to-procedure time.**

Estimated overall effects expressed as  $\exp(\beta)$  with 95% CI; results of multivariate linear regression mixed models; variable to be explained:  $Y = \log(\text{FMC-to-procedure time})$ ; (A) results adjusted on period and gender; (B) cardiovascular history was a history of stroke, transient ischemic attack, coronary artery disease, or myocardial infarction; results adjusted on period, age, gender, diabetes, hypertension, dyslipidemia, obesity and smoking as risk factors; (C) the reference modality for the deprivation index Fdep15 in five categories was "most disadvantaged"; results adjusted on period, age, gender, country of birth, urbanicity of residence.

Supplementary material 1.

Conceptual framework

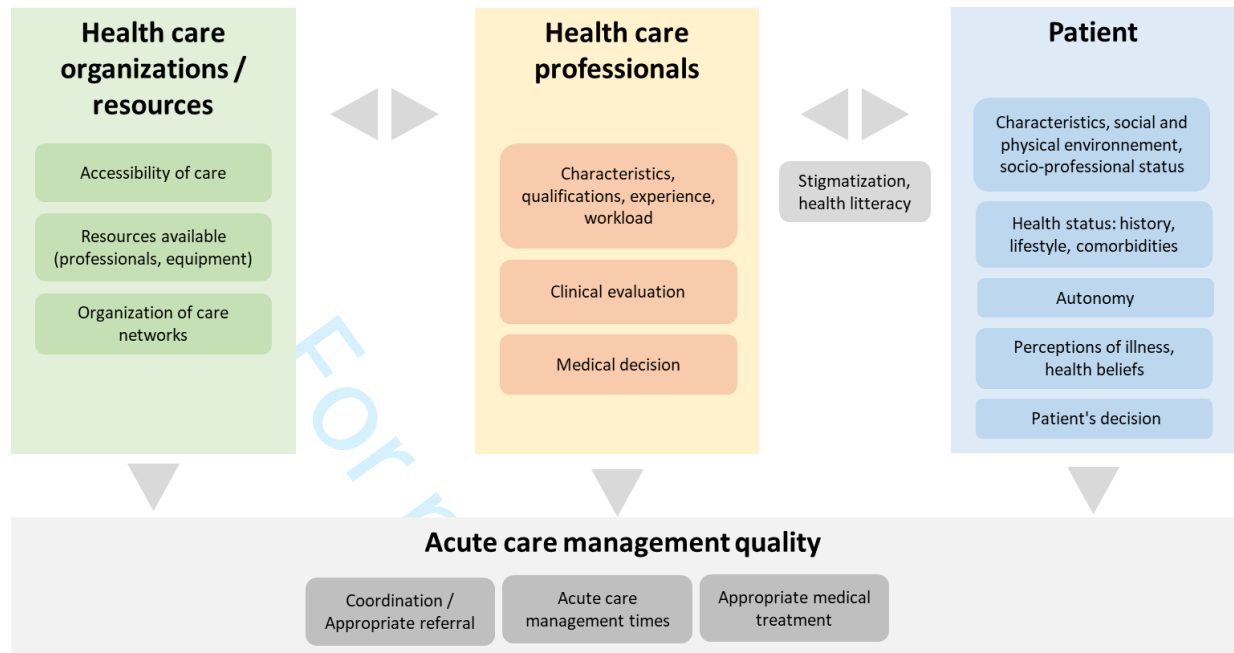

## Classification of the variables according to the conceptual framework and used for the directed acyclic graphs (DAG)

Variables identified in the literature and available in the databases were classified into each dimension. Selected confounders were then identified by six DAG, one for each model. We forced adjustment for age and gender.

### Stroke cohort

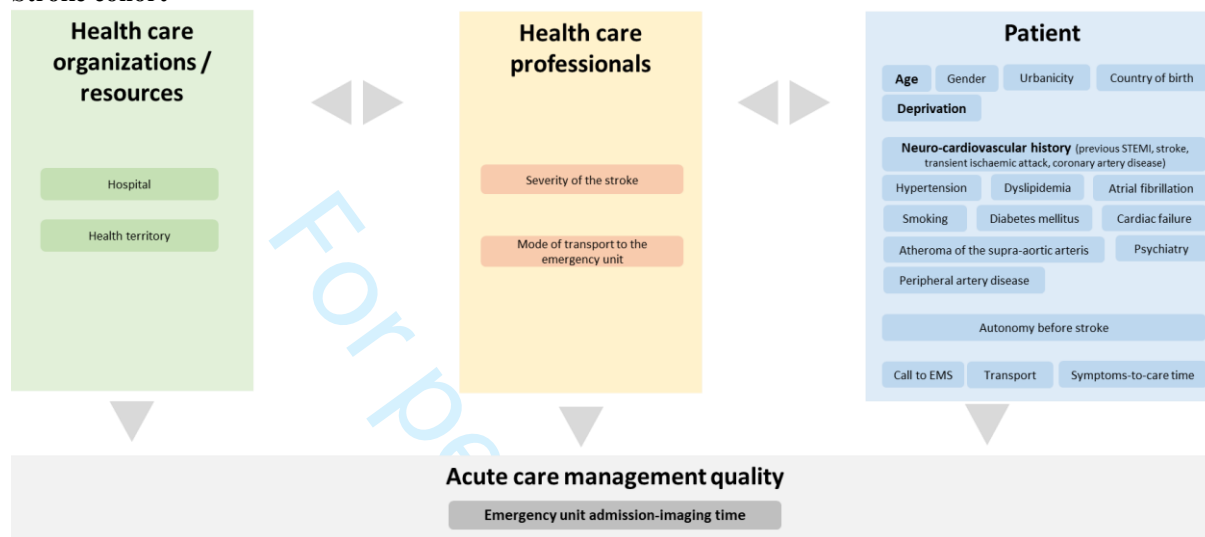

### STEMI cohort

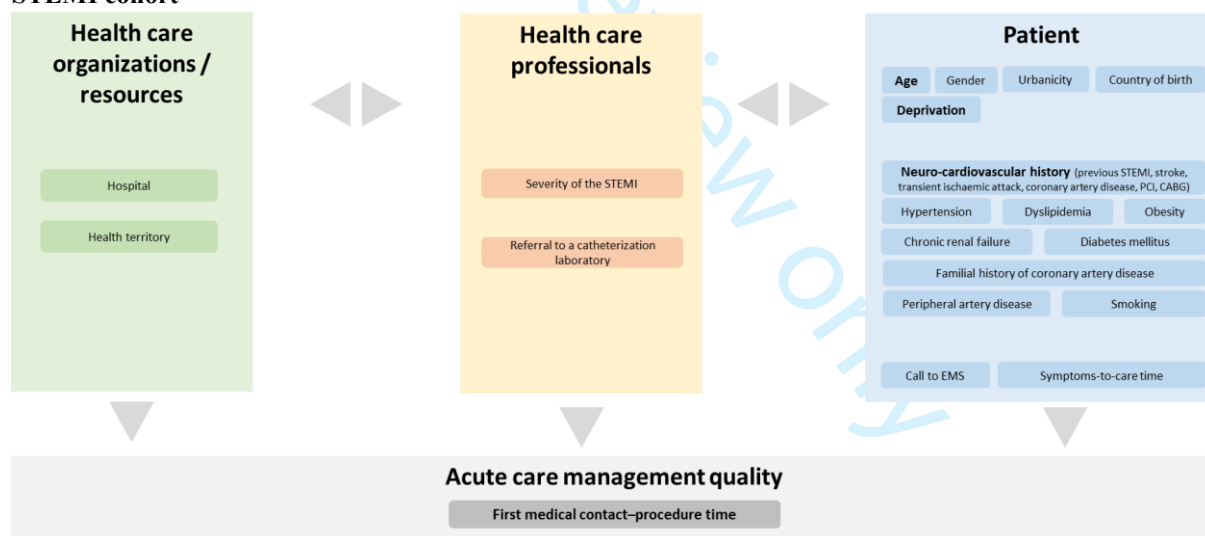

In bold: exposure variables,

CABG=coronary artery bypass graft, EMS=emergency medical service, PCI= percutaneous coronary intervention, STEMI=segment elevation myocardial infarction.

**Confounders introduced in the stroke and STEMI final models estimating the association between clinical and social vulnerabilities effects on care management times**

| <b>Category of exposure</b>         | <b>STEMI cohort Models</b>                                                                                                               | <b>Stroke Cohort Models</b>                                                                                 |
|-------------------------------------|------------------------------------------------------------------------------------------------------------------------------------------|-------------------------------------------------------------------------------------------------------------|
| <b>Age</b>                          | Gender, hospital (random effect), health territory (random effect)                                                                       | Gender, hospital (random effect), health territory (random effect)                                          |
| <b>Neuro-cardiovascular history</b> | Age, gender, diabetes mellitus, hypertension, dyslipidemia, obesity, smoking, hospital (random effect), health territory (random effect) | Age, gender, diabetes mellitus, smoking, FDep15, hospital (random effect), health territory (random effect) |
| <b>Fdep 15</b>                      | Age, gender, country of birth, hospital (random effect), health territory (random effect)                                                | Age, gender, urbanicity, country of birth, hospital (random effect), health territory (random effect)       |

FDep15=deprivation index; STEMI=segment elevation myocardial infarction; urbanicity of residence: urban of the patient's residence area defined as commune or group of communes with a continuous built-up area with at least 2,000 inhabitants.

## Supplementary material 2.

## Description of the stroke and STEMI cohorts study sample (N=9,218)

|                                                             |                      | Stroke cohort<br>(N=6,436) |        | STEMI cohort<br>(N=2,782) |        |
|-------------------------------------------------------------|----------------------|----------------------------|--------|---------------------------|--------|
|                                                             |                      | n                          | (%)    | n                         | Median |
| <b>Patient socio-demographic characteristics</b>            |                      |                            |        |                           |        |
| <b>Sexe</b>                                                 |                      |                            |        |                           |        |
|                                                             | Male                 | 3533                       | (54.9) | 2033                      | (73.1) |
|                                                             | Female               | 2903                       | (45.1) | 749                       | (26.9) |
| <b>Age</b>                                                  |                      |                            |        |                           |        |
|                                                             | [18-65 years[        | 1201                       | (18.7) | 1381                      | (49.7) |
|                                                             | [65 years and older[ | 5235                       | (81.3) | 1395                      | (50.3) |
|                                                             | Missing values       |                            |        | 6                         |        |
| <b>Urbanicity</b>                                           |                      |                            |        |                           |        |
|                                                             | Urban                | 4,451                      | (72.3) | 1,843                     | (72.5) |
|                                                             | Rural                | 1,702                      | (27.7) | 700                       | (27.5) |
|                                                             | Missing values       | 283                        |        | 239                       |        |
| <b>Accessibility to general practitioners (APL MG 2018)</b> |                      |                            |        |                           |        |
|                                                             | [0 - 3,1[            | 989                        | (16.0) | 399                       | (15.7) |
|                                                             | [3,1 - 3,8[          | 1139                       | (18.5) | 460                       | (18.1) |
|                                                             | [3,8 - 4,7[          | 1939                       | (31.4) | 773                       | (30.5) |
|                                                             | [4,7 et plus]        | 2104                       | (34.1) | 905                       | (35.7) |
|                                                             | Missing values       | 265                        |        | 245                       |        |
| <b>Deprivation (Fdep15)</b>                                 |                      |                            |        |                           |        |
|                                                             | Most advantaged      | 994                        | (16.2) | 325                       | (12.8) |
|                                                             | Advantaged           | 1522                       | (24.8) | 596                       | (23.5) |
|                                                             | Intermediate         | 1115                       | (18.1) | 578                       | (22.8) |
|                                                             | Disadvantaged        | 1185                       | (19.3) | 578                       | (22.8) |
|                                                             | Most disadvantaged   | 1329                       | (21.6) | 460                       | (18.1) |
|                                                             | Missing values       | 291                        |        | 245                       |        |
| <b>Patient clinical history and risk factors</b>            |                      |                            |        |                           |        |
| <b>Neuro-cardiovascular history</b>                         |                      |                            |        |                           |        |
|                                                             | Absence              | 4594                       | (71.4) | 1822                      | (65.5) |
|                                                             | Presence             | 1842                       | (28.6) | 569                       | (20.5) |
|                                                             | Unknown              |                            |        | 391                       | (14.0) |
| <b>Coronary artery disease or STEMI history</b>             |                      |                            |        |                           |        |
|                                                             | No                   | 5660                       | (87.9) | 2,031                     | (73.0) |
|                                                             | Yes                  | 776                        | (12.1) | 530                       | (19.1) |
|                                                             | Unknown              |                            |        | 221                       | (7.9)  |
| <b>Coronary artery disease</b>                              |                      |                            |        |                           |        |
|                                                             | Absence              | 5,877                      | (91.3) |                           |        |
|                                                             | Presence             | 559                        | (8.7)  |                           |        |
| <b>Previous STEMI</b>                                       |                      |                            |        |                           |        |
|                                                             | Absence              | 6,057                      | (94.1) |                           |        |
|                                                             | Presence             | 379                        | (5.9)  |                           |        |
| <b>Previous stroke or transient ischemic attack</b>         |                      |                            |        |                           |        |
|                                                             | Absence              | 5,166                      | (80.3) |                           |        |
|                                                             | Presence             | 1,270                      | (19.7) |                           |        |
| <b>Peripheral arterial disease</b>                          |                      |                            |        |                           |        |
|                                                             | No                   | 6,144                      | (95.5) | 2,245                     | (80.7) |
|                                                             | Yes                  | 292                        | (4.5)  | 70                        | (2.5)  |
|                                                             | Unknown              |                            |        | 467                       | (16.8) |
| <b>Chronic renal failure</b>                                |                      |                            |        |                           |        |
|                                                             | No                   |                            |        | 2,782                     |        |
|                                                             | Yes                  |                            |        | 2,264                     | (81.4) |
|                                                             | Unknown              |                            |        | 47                        | (1.7)  |
| <b>Atrial fibrillation</b>                                  |                      |                            |        |                           |        |
|                                                             | Absence              | 5,348                      | (83.1) |                           |        |
|                                                             | Presence             | 1,088                      | (16.9) |                           |        |
| <b>Cardiac failure</b>                                      |                      |                            |        |                           |        |
|                                                             | Absence              | 6,114                      | (95.0) |                           |        |
|                                                             | Presence             | 322                        | (5.0)  |                           |        |

|                                                    |          |       |        |       |        |
|----------------------------------------------------|----------|-------|--------|-------|--------|
| <b>Obesity</b>                                     |          |       |        | 2,782 |        |
|                                                    | Absence  |       |        | 1801  | (64.7) |
|                                                    | Presence |       |        | 513   | (18.4) |
|                                                    | Unknown  |       |        | 468   | (16.8) |
| <b>Diabetes mellitus</b>                           |          | 6,436 |        | 2,782 |        |
|                                                    | No       | 5,198 | (80.8) | 2,119 | (76.2) |
|                                                    | Yes      | 1,238 | (19.2) | 414   | (12.9) |
|                                                    | Unknown  |       |        | 249   | (9.0)  |
| <b>Arterial hypertension</b>                       |          | 6,436 |        | 2,782 |        |
|                                                    | No       | 2,419 | (37.6) | 1,278 | (45.9) |
|                                                    | Yes      | 4,017 | (62.4) | 1,356 | (48.7) |
|                                                    | Unknown  |       |        | 148   | (5.3)  |
| <b>Dyslipidemia</b>                                |          | 6,436 |        | 2,782 |        |
|                                                    | No       | 4,618 | (71.8) | 1,708 | (61.4) |
|                                                    | Yes      | 1,818 | (28.2) | 887   | (31.9) |
|                                                    | Unknown  |       |        | 187   | (6.7)  |
| <b>Active smoking</b>                              |          | 6,436 |        | 2,782 |        |
|                                                    | No       | 5,103 | (79.3) | 1,194 | (42.9) |
|                                                    | Yes      | 1,333 | (20.7) | 1,163 | (41.8) |
|                                                    | Unknown  |       |        | 425   | (15.3) |
| <b>Familial history of coronary artery disease</b> |          |       |        | 2,782 |        |
|                                                    | No       |       |        | 2070  | (74.4) |
|                                                    | Yes      |       |        | 455   | (16.4) |
|                                                    | Unknown  |       |        | 257   | (9.2)  |

APL MG=potential accessibility to general practitioners, STEMI=segment elevation myocardial infarction.

**STROBE Statement—Checklist of items that should be included in reports of cohort studies**

|                              | <b>Item No</b> | <b>Recommendation</b>                                                                                                                                                                             | <b>Page No</b>           |
|------------------------------|----------------|---------------------------------------------------------------------------------------------------------------------------------------------------------------------------------------------------|--------------------------|
| <b>Title and abstract</b>    | 1              | (a) Indicate the study's design with a commonly used term in the title or the abstract                                                                                                            | ok, page 1,2             |
|                              |                | (b) Provide in the abstract an informative and balanced summary of what was done and what was found                                                                                               | ok, page 2               |
| <b>Introduction</b>          |                |                                                                                                                                                                                                   |                          |
| Background/rationale         | 2              | Explain the scientific background and rationale for the investigation being reported                                                                                                              | ok, page 4               |
| Objectives                   | 3              | State specific objectives, including any prespecified hypotheses                                                                                                                                  | ok, page 6               |
| <b>Methods</b>               |                |                                                                                                                                                                                                   |                          |
| Study design                 | 4              | Present key elements of study design early in the paper                                                                                                                                           | ok, page 6               |
| Setting                      | 5              | Describe the setting, locations, and relevant dates, including periods of recruitment, exposure, follow-up, and data collection                                                                   | ok, pages 6              |
| Participants                 | 6              | (a) <i>Cohort study</i> —Give the eligibility criteria, and the sources and methods of selection of participants. Describe methods of follow-up                                                   | ok, pages 6              |
|                              |                | (b) <i>Cohort study</i> —For matched studies, give matching criteria and number of exposed and unexposed                                                                                          | NA                       |
| Variables                    | 7              | Clearly define all outcomes, exposures, predictors, potential confounders, and effect modifiers. Give diagnostic criteria, if applicable                                                          | ok, pages 6,7            |
| Data sources/<br>measurement | 8*             | For each variable of interest, give sources of data and details of methods of assessment (measurement). Describe comparability of assessment methods if there is more than one group              | ok, pages 6,7            |
| Bias                         | 9              | Describe any efforts to address potential sources of bias                                                                                                                                         | ok, page 6,7,8           |
| Study size                   | 10             | Explain how the study size was arrived at                                                                                                                                                         | ok, page 6               |
| Quantitative variables       | 11             | Explain how quantitative variables were handled in the analyses. If applicable, describe which groupings were chosen and why                                                                      | ok, page 8               |
| Statistical methods          | 12             | (a) Describe all statistical methods, including those used to control for confounding                                                                                                             | ok, page 8               |
|                              |                | (b) Describe any methods used to examine subgroups and interactions                                                                                                                               | ok, page 8               |
|                              |                | (c) Explain how missing data were addressed                                                                                                                                                       | ok, page 7               |
|                              |                | (d) <i>Cohort study</i> —If applicable, explain how loss to follow-up was addressed                                                                                                               | NA                       |
|                              |                | (e) Describe any sensitivity analyses                                                                                                                                                             | NA                       |
| <b>Results</b>               |                |                                                                                                                                                                                                   |                          |
| Participants                 | 13*            | (a) Report numbers of individuals at each stage of study—eg numbers potentially eligible, examined for eligibility, confirmed eligible, included in the study, completing follow-up, and analysed | ok, page 8               |
|                              |                | (b) Give reasons for non-participation at each stage                                                                                                                                              | NA                       |
|                              |                | (c) Consider use of a flow diagram                                                                                                                                                                | NA                       |
| Descriptive data             | 14*            | (a) Give characteristics of study participants (eg demographic, clinical, social) and information on exposures and potential confounders                                                          | ok, page 8,9, suppl mat. |
|                              |                | (b) Indicate number of participants with missing data for each variable of interest                                                                                                               | ok, tables               |

|                          |     |                                                                                                                                                                                                              |                    |
|--------------------------|-----|--------------------------------------------------------------------------------------------------------------------------------------------------------------------------------------------------------------|--------------------|
|                          |     | (c) <i>Cohort study</i> —Summarise follow-up time (eg, average and total amount)                                                                                                                             | NA                 |
| Outcome data             | 15* | <i>Cohort study</i> —Report numbers of outcome events or summary measures over time                                                                                                                          | ok, tables         |
| Main results             | 16  | (a) Give unadjusted estimates and, if applicable, confounder-adjusted estimates and their precision (eg, 95% confidence interval). Make clear which confounders were adjusted for and why they were included | ok, page 9,10      |
|                          |     | (b) Report category boundaries when continuous variables were categorized                                                                                                                                    | ok, tables         |
|                          |     | (c) If relevant, consider translating estimates of relative risk into absolute risk for a meaningful time period                                                                                             | NA                 |
| Other analyses           | 17  | Report other analyses done—eg analyses of subgroups and interactions, and sensitivity analyses                                                                                                               | NA                 |
| <b>Discussion</b>        |     |                                                                                                                                                                                                              |                    |
| Key results              | 18  | Summarise key results with reference to study objectives                                                                                                                                                     | ok, pages 10       |
| Limitations              | 19  | Discuss limitations of the study, taking into account sources of potential bias or imprecision. Discuss both direction and magnitude of any potential bias                                                   | ok, pages 12,13    |
| Interpretation           | 20  | Give a cautious overall interpretation of results considering objectives, limitations, multiplicity of analyses, results from similar studies, and other relevant evidence                                   | ok, pages 10,11,12 |
| Generalisability         | 21  | Discuss the generalisability (external validity) of the study results                                                                                                                                        | ok, pages 13       |
| <b>Other information</b> |     |                                                                                                                                                                                                              |                    |
| Funding                  | 22  | Give the source of funding and the role of the funders for the present study and, if applicable, for the original study on which the present article is based                                                | ok, page 15        |

NA= not applicable



# BMJ Open

## Social and clinical vulnerability in stroke and STEMI management during the COVID-19 pandemic: A registry-based study

|                                 |                                                                                                                                                                                                                                                                                                                                                                                                                                                                                                                                                                                                                                                                                                                                                                                                                                                                                                                                                                                                                                                                                                                                                                                                                                                                                                                                                                                                                                                                                                                                                                                                                                          |
|---------------------------------|------------------------------------------------------------------------------------------------------------------------------------------------------------------------------------------------------------------------------------------------------------------------------------------------------------------------------------------------------------------------------------------------------------------------------------------------------------------------------------------------------------------------------------------------------------------------------------------------------------------------------------------------------------------------------------------------------------------------------------------------------------------------------------------------------------------------------------------------------------------------------------------------------------------------------------------------------------------------------------------------------------------------------------------------------------------------------------------------------------------------------------------------------------------------------------------------------------------------------------------------------------------------------------------------------------------------------------------------------------------------------------------------------------------------------------------------------------------------------------------------------------------------------------------------------------------------------------------------------------------------------------------|
| Journal:                        | <i>BMJ Open</i>                                                                                                                                                                                                                                                                                                                                                                                                                                                                                                                                                                                                                                                                                                                                                                                                                                                                                                                                                                                                                                                                                                                                                                                                                                                                                                                                                                                                                                                                                                                                                                                                                          |
| Manuscript ID                   | bmjopen-2023-073933.R1                                                                                                                                                                                                                                                                                                                                                                                                                                                                                                                                                                                                                                                                                                                                                                                                                                                                                                                                                                                                                                                                                                                                                                                                                                                                                                                                                                                                                                                                                                                                                                                                                   |
| Article Type:                   | Original research                                                                                                                                                                                                                                                                                                                                                                                                                                                                                                                                                                                                                                                                                                                                                                                                                                                                                                                                                                                                                                                                                                                                                                                                                                                                                                                                                                                                                                                                                                                                                                                                                        |
| Date Submitted by the Author:   | 22-Nov-2023                                                                                                                                                                                                                                                                                                                                                                                                                                                                                                                                                                                                                                                                                                                                                                                                                                                                                                                                                                                                                                                                                                                                                                                                                                                                                                                                                                                                                                                                                                                                                                                                                              |
| Complete List of Authors:       | <p>Lesaine, Emilie; CHU de Bordeaux, CIC-EC 14-01; Bordeaux Population Health, University of Bordeaux, ISPED, Centre INSERM U1219</p> <p>Francis, Florence; CHU de Bordeaux, Pôle de santé publique, Service d'Information Médicale ; Bordeaux Population Health, University of Bordeaux, ISPED, Centre INSERM U1219</p> <p>Domecq, Sandrine; CHU de Bordeaux, CIC-EC 14-01; Bordeaux Population Health, University of Bordeaux, ISPED, Centre INSERM U1219</p> <p>Miganeh-Hadi, Sahal; CHU de Bordeaux, CIC-EC 14-01; Bordeaux Population Health, University of Bordeaux, ISPED, Centre INSERM U1219</p> <p>Sevin, Floriane; CHU de Bordeaux, CIC-EC 14-01; Bordeaux Population Health, University of Bordeaux, ISPED, Centre INSERM U1219</p> <p>Sibon, Igor; CHU Bordeaux GH Pellegrin, Stroke Unit; INCIA, CNRS UMR 5287</p> <p>Rouanet, François; Centre Hospitalier Universitaire de Bordeaux Groupe hospitalier Pellegrin, Stroke unit</p> <p>Pradeau, Catherine; CHU de Bordeaux, Pôle de médecine d'urgence</p> <p>Coste, Pierre; CHU de Bordeaux Hôpital Cardiologique, Coronary Care Unit</p> <p>Cetran, Laura; CHU de Bordeaux Hôpital Cardiologique, Coronary Care Unit</p> <p>Vandentorren, Stephanie ; Sante publique France; Bordeaux Population Health, University of Bordeaux, ISPED, Centre INSERM U1219</p> <p>Saillour, Florence; CHU de Bordeaux, Pôle de santé publique, Service d'Information Médicale; Bordeaux Population Health, University of Bordeaux, ISPED, Centre INSERM U1219</p> <p>AVICOVID Group, AVICOVID Group; Bordeaux Population Health, University of Bordeaux, ISPED, Centre INSERM U1219</p> |
| <b>Primary Subject Heading</b>: | Health services research                                                                                                                                                                                                                                                                                                                                                                                                                                                                                                                                                                                                                                                                                                                                                                                                                                                                                                                                                                                                                                                                                                                                                                                                                                                                                                                                                                                                                                                                                                                                                                                                                 |
| Secondary Subject Heading:      | Emergency medicine, Health policy, Public health, Epidemiology                                                                                                                                                                                                                                                                                                                                                                                                                                                                                                                                                                                                                                                                                                                                                                                                                                                                                                                                                                                                                                                                                                                                                                                                                                                                                                                                                                                                                                                                                                                                                                           |
| Keywords:                       | COVID-19, Quality in health care < HEALTH SERVICES ADMINISTRATION & MANAGEMENT, Health policy < HEALTH SERVICES ADMINISTRATION & MANAGEMENT, Organisation of health services < HEALTH SERVICES ADMINISTRATION & MANAGEMENT, Health Services Accessibility, Health Equity                                                                                                                                                                                                                                                                                                                                                                                                                                                                                                                                                                                                                                                                                                                                                                                                                                                                                                                                                                                                                                                                                                                                                                                                                                                                                                                                                                 |

1  
2  
3  
4  
5  
6  
7  
8  
9  
10  
11  
12  
13  
14  
15  
16  
17  
18  
19  
20  
21  
22  
23  
24  
25  
26  
27  
28  
29  
30  
31  
32  
33  
34  
35  
36  
37  
38  
39  
40  
41  
42  
43  
44  
45  
46  
47  
48  
49  
50  
51  
52  
53  
54  
55  
56  
57  
58  
59  
60

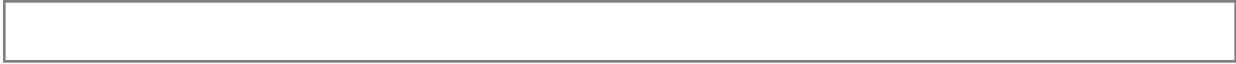

SCHOLARONE™  
Manuscripts



I, the Submitting Author has the right to grant and does grant on behalf of all authors of the Work (as defined in the below author licence), an exclusive licence and/or a non-exclusive licence for contributions from authors who are: i) UK Crown employees; ii) where BMJ has agreed a CC-BY licence shall apply, and/or iii) in accordance with the terms applicable for US Federal Government officers or employees acting as part of their official duties; on a worldwide, perpetual, irrevocable, royalty-free basis to BMJ Publishing Group Ltd ("BMJ") its licensees and where the relevant Journal is co-owned by BMJ to the co-owners of the Journal, to publish the Work in this journal and any other BMJ products and to exploit all rights, as set out in our [licence](#).

The Submitting Author accepts and understands that any supply made under these terms is made by BMJ to the Submitting Author unless you are acting as an employee on behalf of your employer or a postgraduate student of an affiliated institution which is paying any applicable article publishing charge ("APC") for Open Access articles. Where the Submitting Author wishes to make the Work available on an Open Access basis (and intends to pay the relevant APC), the terms of reuse of such Open Access shall be governed by a Creative Commons licence – details of these licences and which [Creative Commons](#) licence will apply to this Work are set out in our licence referred to above.

Other than as permitted in any relevant BMJ Author's Self Archiving Policies, I confirm this Work has not been accepted for publication elsewhere, is not being considered for publication elsewhere and does not duplicate material already published. I confirm all authors consent to publication of this Work and authorise the granting of this licence.

1  
2  
3 **Social and clinical vulnerability in stroke and STEMI management during the COVID-19**  
4 **pandemic: A registry-based study**  
5  
6

7  
8 Emilie Lesaine<sup>ab</sup>, Florence Francis<sup>ac</sup>, Sandrine Domecq<sup>ab</sup>, Sahal Miganeh-Hadi <sup>ab</sup>, Floriane Sevin<sup>ab</sup>, Igor  
9 Sibon<sup>de</sup>, François Rouanet<sup>d</sup>, Catherine Pradeau<sup>f</sup>, Pierre Coste<sup>g</sup>, Laura Cetran<sup>g</sup>, Stéphanie Vandentorren<sup>ah</sup>,  
10 Florence Saillour-Glénisson<sup>ac</sup> and the AVICOVID group<sup>a</sup>  
11  
12  
13

14 a Bordeaux Population Health, University of Bordeaux, ISPED, Centre INSERM U1219, Bordeaux,  
15 Nouvelle-Aquitaine, FR.

16 b CHU de Bordeaux, CIC-EC 14-01, Bordeaux, Aquitaine, FR.

17 c CHU de Bordeaux, Pôle de santé publique, Service d'Information Médicale, Bordeaux, Aquitaine,  
18 FR.

19 d CHU de Bordeaux, Stroke Unit, Bordeaux, FR.

20 e University of Bordeaux, INCIA CNRS UMR 5287, Bordeaux, FR.

21 f CHU de Bordeaux, Pôle de médecine d'urgence, Bordeaux, Aquitaine, FR

22 g CHU de Bordeaux Hôpital Cardiologique, Coronary Care Unit, Pessac, Nouvelle-Aquitaine, FR.

23 h Sante Publique France, Saint Maurice, FR  
24  
25  
26  
27  
28  
29  
30

31 **Corresponding author**

32 Dr Emilie Lesaine

33 Institut de Santé Publique, d'Epidémiologie et de Développement (ISPED)

34 146, rue Léo Saignat, 33076 Bordeaux Cedex

35 Telephone number: +(33) 557579249

36 Email: emilie.lesaine@u-bordeaux.fr  
37  
38  
39  
40  
41  
42  
43  
44  
45  
46  
47  
48  
49  
50  
51  
52  
53  
54  
55  
56  
57  
58  
59  
60

## ABSTRACT

**Objective.** To evaluate whether the first wave of the COVID-19 pandemic resulted in a deterioration in the quality of care for socially and/or clinically vulnerable stroke and ST-segment elevation myocardial infarction (STEMI) patients.

**Design.** Two cohorts of STEMI and stroke patients in the Aquitaine neuro-cardiovascular registry.

**Setting.** Six emergency medical services, 30 emergency units, 14 hospitalisation units, and 11 catheterisation laboratories in the Aquitaine region in France.

**Participants.** This study involved 9218 patients (6436 stroke and 2782 STEMI patients) in the neuro-cardiovascular registry from January 2019 to August 2020.

**Primary outcome measures.** Care management times in both cohorts: first medical contact-to-procedure time for the STEMI cohort; emergency unit admission-to-imaging time for the stroke cohort. Associations between social (deprivation index) and clinical (age > 65 years, neuro-cardiovascular history) vulnerabilities and care management times were analysed using multivariate linear mixed models, with an interaction on the time period (pre-, per-, and post-first COVID-19 wave).

**Results.** The first medical contact-procedure time was longer for elderly ( $p < 0.001$ ) and "very socially disadvantaged" ( $p = 0.003$ ) STEMI patients, with no interaction regarding the COVID-19 period (age,  $p = 0.54$ ; neuro-cardiovascular history,  $p = 0.70$ ; deprivation,  $p = 0.64$ ). We found no significant association between vulnerabilities and the admission-imaging time for stroke patients, and no interaction with respect to the COVID-19 period (age,  $p = 0.81$ ; neuro-cardiovascular history,  $p = 0.34$ ; deprivation,  $p = 0.95$ ).

**Conclusions.** This study revealed pre-existing inequalities in care management times for vulnerable STEMI and stroke patients; however, these inequalities were neither accentuated nor reduced during the first COVID-19 wave. Measures implemented during the crisis did not alter the structured emergency pathway for these patients.

**Trial registration:** NCT04979208

## STRENGTHS AND LIMITATIONS OF THIS STUDY

- The study analysed two large high-quality data cohorts comprising almost 10000 stroke and STEMI patients, managed in a large panel of care structures throughout the Aquitaine region, over a period of several months before and after the first wave.
- We studied vulnerabilities from two perspectives, a social perspective through an ecological social deprivation index and a clinical perspective through risk factors of severe COVID-19.
- The explanatory analyses yield robust results due to the large amount of data collected (clinical and socio-geographical characteristics, acute care management pathway data), enabling integration of a wide variety of confounders.
- The exclusion of patients who did not enter the healthcare system prevented quantification of healthcare system avoidance, that is supposed to have been more frequent among socially and/or clinically vulnerable patients during the COVID-19 pandemic.
- The study area was limited to the Aquitaine region, one of the regions least affected by the first wave of the COVID-19 pandemic in France; this situation could have led to the exertion of less pressure on health services.

## INTRODUCTION

ST-segment elevation myocardial infarction (STEMI) and stroke are life-threatening and highly time-sensitive emergencies. The time elapsed from symptom onset to treatment is a predictor of patients' mortality and functional recovery.(1,2) The standardised and timed care pathways for these two diseases depend initially on a patient's use of the emergency medical service (EMS) system, followed by close collaboration between emergency structures and specialised technical platforms (e.g., catheterisation laboratories, stroke units).(1,2) The quality of care is often evaluated under the prism of the time from first medical contact (FMC) to treatment.(1,2)

In France, patients with acute chest pain or neurological deficit are advised to rapidly call the nationwide EMS using a unique medical dispatch number. In cases of suspected stroke or STEMI, the EMS dispatches rapid transport, including a doctor for STEMI and life-threatening situations, to transfer the patient to a specialised technical platform. If not suspected, the EMS physician may refer the patient to a general practitioner for initial evaluation, or advise them to go to the emergency unit (EU).

Patients with STEMI and stroke face social and health inequality issues. Socially vulnerable (i.e., disadvantaged) patients with neuro-cardiovascular diseases have higher morbidity and mortality rates.(3,4) Four markers of social position and socioeconomic status have been associated with cardiovascular disease in high-income countries: income level, educational attainment, employment status, and environmental factors.(5) These inequalities are attributable to a higher prevalence of biological, behavioral and psychosocial cardiovascular risk factors in the more socially disadvantaged population but also to more difficulties in accessing healthcare and lower-quality acute care management.(4,6,7) The organisation of the healthcare system, as a social health determinant, leads to health inequalities, due mainly to challenges related to communication and health literacy, implicit bias, and/or a lack of culturally competent care.(8)

The 2019 coronavirus disease (COVID-19) dramatically modified healthcare systems worldwide and had major consequences for patients' access to care for stroke and STEMI.(9–11) From February to March 2020, many health authorities, including those in France, implemented strict nationwide lockdowns and series of policies to curb the surge of patients requiring critical care. This crisis, and particularly the lockdown periods, induced the major reorganisation of healthcare systems and modified the use of care to accommodate the onslaught of patients with COVID-19.(12) Studies of the association between the COVID-19 pandemic and the quality of stroke and STEMI management have yielded contrasting results, with most revealing longer management delays and reductions in the number of procedures performed.(9,10,13)

During pandemics (e.g., of influenza, plague), pre-existing inequalities affecting many aspects of patients' care pathways (e.g., loss of employment and income; social isolation, especially for elderly individuals; and mental health issues, particularly for young people) are usually amplified.(14–18) During the COVID-19 pandemic, COVID-19 exposure, severe disease, hospitalisation, and death were more frequent among socially disadvantaged people.(15,17–19) This population benefited less from the

1  
2  
3 collective protective measures taken against COVID-19, had more difficulty accessing preventative  
4 healthcare, and had lower rates of COVID-19 testing and vaccination.(14) Some experts consider  
5 COVID-19 to be a syndemic, rather than a pandemic. These interactions between COVID-19 and pre-  
6 existing socioeconomic inequalities in non-communicable diseases are an illustration.(16) Indeed,  
7 “syndemics are characterised by biological and social interactions between conditions and states,  
8 interactions that increase a person’s susceptibility to harm or worsen their health outcomes.”(16) We  
9 hypothesised that socially vulnerable patients, defined as those with low socioeconomic status, may  
10 experience longer acute management times during the COVID-19 pandemic.

11 In France, to protect more vulnerable patients and adapt care, health authorities identified several risk  
12 factors of severe COVID-19 based on demographic (advanced age) and medical (especially  
13 cardiovascular co-morbidities) characteristics.(20) For these populations defined as “clinically  
14 vulnerable patients”, French authorities have stressed the importance of adhering to barrier measures,  
15 maintaining physical distancing, particularly during hospitalisation, and to limit travel to high-risk areas  
16 for SARS-CoV-2 transmission. Information about these risk factors was covered widely in the media  
17 which may have led exposed individuals with these underlying conditions to delay seeking  
18 treatment.(21) Based on these recommendations, we hypothesised that additional protective measures  
19 may have been implemented for these clinically more vulnerable populations, resulting in increased  
20 management delays.

21 To our knowledge, only one study has evaluated whether COVID-19 modified the associations among  
22 the educational level, deprivation, hospital admission indicators, and quality of hospital care, especially  
23 for patients with neuro-cardiovascular diseases.(22) The researchers found larger declines in the hospital  
24 access of women, elderly, and less-educated individuals; in contrast, the timeliness of percutaneous  
25 coronary intervention (PCI) showed no education- or deprivation-related gradient.

26 Since 2012, the “CNV Registry” of neuro-cardiovascular diseases evaluate the care pathways for STEMI  
27 and stroke patients in the Aquitaine region of southwestern France (3 million inhabitants). This registry  
28 provides a unique opportunity to study differences in care management and their evolution over time in  
29 a country with universal health coverage.(23)

30 COVID-19 profoundly modified access to and the use and organisation of care, against a backdrop of  
31 pre-existing inequalities in neuro-cardiovascular disease.(12) The notion of a “syndemic” and our  
32 hypothesis that management times were longer for patients at risk of severe COVID-19 during its first  
33 wave prompted our investigation of whether first COVID-19 wave resulted in the deterioration of the  
34 quality of care for socially and clinically vulnerable stroke and STEMI patients, using data from the  
35 CNV Registry.



## METHODS

### Study design and population

We used two exhaustive retrospective cohorts of adult stroke and STEMI patients admitted to a care structure in the Aquitaine region whose data were entered into the CNV Registry between January 1, 2019, and August 31, 2020.(23)

The STEMI cohort comprised patients with recent (<24 h after symptom onset) STEMI managed in one of the six health territories in Aquitaine, each centered around an EMS, comprising 30 EUs and 11 catheterisation laboratories (nearly 1800 STEMI are seen annually).

The stroke cohort comprised patients with recent ischemic or hemorrhagic stroke (excluding transient ischemic attacks), diagnosed by brain imaging and validated by neurovascular physicians, that was managed in five health territories in Aquitaine, comprising 14 (7 with stroke units) of the 20 hospitals caring for more than 30 strokes per year in Aquitaine (nearly 5000 strokes are seen annually).

The CNV Registry was approved by the French authority on data protection and met the regulatory requirements for the handling of patient information (file 2216283). The study was approved by the Bordeaux University Hospital Ethics Board (CER-BDX 2023-131).

### Data collection

The CNV Registry contains information on patients' sociodemographic (age, gender, place of residence) and clinical [medical history, cardiovascular risk factors, stroke clinical severity (modified Rankin scale and National Institute of Health Stroke Score), stroke type (ischemic/hemorrhagic)] characteristics, use of care (calls to emergency services, FMC, symptom onset-care time), acute care management quality (times between key management steps, pre-hospital and hospital pathway types, treatment), and structural characteristics of care (care during on-call activity, calls to emergency services during care, hospital administrative status, FMC-catheterisation laboratory distance). Data are collected prospectively by physicians; consolidated retrospectively by clinical research assistants and then extracted from the hospital information system. Data from the two cohorts were integrated into one data warehouse enabling the reconstruction of the STEMI or stroke management pathway.(12)

### Outcomes

The primary endpoints were acute-care management times, which reflect the quality of care. For the STEMI cohort, we used the FMC-procedure time [delay (in minutes) between the FMC (mobile intensive care unit arrival or EU admission) and the start of a treatment procedure]. For the stroke cohort, we used the EU admission-imaging time [delay (in minutes) between EU admission and the start of the first imaging]. This selection of an interval that focused on the beginning of in-hospital stroke care was required due to the heterogeneity of the pre-hospital pathways and treatments applied.

### Exposure

Clinically vulnerable persons at risk of severe COVID-19 were those aged > 65 years; with neuro-cardiovascular history including previous STEMI, stroke, or transient ischemic attack; and/or with

1  
2  
3 coronary artery disease history. For the STEMI cohort, the history of a PCI, a coronary artery bypass  
4 graft was also included.  
5

6 Due to the lack of individual socioeconomic data, an ecological social deprivation score was assigned to  
7 each commune (the smallest administrative unit in France) of patients' residence using the 2015  
8 deprivation index (Fdep15) to assess social vulnerability.(24) This index is associated strongly with  
9 mortality at all geographic scales. It served as the first dimension of a principal component analysis  
10 (weighted by population size) of four socioeconomic ecological variables: the percentage of high-school  
11 graduates  $\geq 15$  years old, median household income, percentage of blue-collar workers, and  
12 unemployment rate. Quintiles of the Fdep15 scores were computed for metropolitan France, whereby the  
13 first quintile (Q1) represented the least and the fifth quintile (Q5) the most disadvantaged communes. We  
14 calculated the deprivation score for each patient of our sample with reference to the quintiles of the French  
15 population.  
16  
17  
18  
19  
20  
21

### 22 **Statistical analyses**

23 Analyses were performed separately for each cohort and exposure variable. Associations between clinical  
24 and social vulnerabilities' effects on care management times (introduced as continuous variables after  
25 logarithmic transformation) were analysed using multivariate linear mixed models (three each for stroke  
26 and STEMI), with random effects on hospital and health territories centered around single EMSs.  
27 Interactions on the time period were introduced. Three COVID-19 periods were defined according to the  
28 dates of first hospital reorganisation (mid-February) and the termination of national lockdown (May 10,  
29 2020): pre-wave (January 1, 2019–February 9, 2020), per-wave (February 10–May 10, 2020), and post-  
30 wave (May 11–August 31, 2020). Inspired by the conceptual framework developed by the Health Care  
31 Quality Indicator Project of the Organization for Economic Cooperation and Development, we  
32 categorised determinants in four dimensions: patients, physicians, care organisations, and quality of  
33 care.(25) To develop the causal model, variables were classified into each of these dimensions and  
34 confounders were then identified by directed acyclic graphs (DAG; Supplementary Material 1). The  
35 relationships between vulnerabilities and care management times were quantified ( $\beta$ ) using the contrast  
36 method, with statistical significance defined as  $p < 0.05$ . The exponentials of the beta values [ $\exp(\beta)$ ],  
37 associated 95% confidence intervals (CIs), and percentage changes [ $1-\exp(\beta)$ ] were then calculated. The  
38 statistical analyses were conducted using SAS 9.4.  
39  
40  
41  
42  
43  
44  
45  
46  
47  
48  
49

### 50 **Patient and public involvement statement**

51 As members of the CNV registry scientific boards, patient representatives were involved in study  
52 conception, implementation, and dissemination; they validated data collection and analysis, and results  
53 diffusion. Dissemination of results was conducted on the CNV registry website, to the scientific boards,  
54 and to care-structure physicians.  
55

56 This study is reported in accordance with the Strengthening the Reporting of Observational Studies in  
57 Epidemiology guidelines and is registered with ClinicalTrials.gov (NCT04979208).  
58  
59  
60

## RESULTS

### Sample characteristics

The sample comprised 9218 patients (6436 with stroke, 2782 with STEMI); 54.9% of the stroke patients and 73.1% of the STEMI patients were male. Patients aged > 65 years accounted for 81.3% and 50.1% of the stroke and STEMI patients, respectively. One-quarter of patients had neuro-cardiovascular history (stroke, 28.6%; STEMI, 20.5%). The distributions of the deprivation index quintiles in our sample, ordered from the most advantaged to the most disadvantaged patients of our sample, were 16.2%, 24.8%, 18.1%, 19.3%, and 21.6% for stroke patients and 12.8%, 23.5%, 22.8%, 22.8%, and 18.1% for STEMI patients (Supplementary Material 2).

### Acute care management times

#### *Stroke cohort*

In the pre-wave period, the median admission–imaging time was longer for stroke patients aged > 65 years than for younger patients (84 vs. 79 min) and for patients without than for those with neuro-cardiovascular history (86 vs. 76 min). Acute-care management times were longest for the most advantaged and most disadvantaged patients (both 88 min vs. 77–86 min for the other social deprivation categories; Table 1).

The median admission–imaging time was longer during the per-wave period than during the pre-wave period, regardless of age or neuro-cardiovascular history, but was shorter for the most advantaged patients (80 vs. 88 min). This time was shorter during the post-wave period than during the per-wave period, regardless of age, but was longer for the most advantaged patients (90 vs. 80 min).

**Table 1. Admission-to-imaging time according to vulnerabilities and COVID-19 periods - Stroke cohort (N=6436)**

|                                     | Global<br>(N=6436) | Pre-wave<br>(N=4140) | Per-wave<br>(N=1080) | Post-wave<br>(N=1216) |
|-------------------------------------|--------------------|----------------------|----------------------|-----------------------|
|                                     | Median [IQR] (n)   | Median [IQR] (n)     | Median [IQR] (n)     | Median [IQR] (n)      |
| <b>All patients</b>                 | 86 [47;194] (4819) | 83 [45;201] (3014)   | 91 [51;175] (889)    | 88 [52;191] (916)     |
| Missing value                       | (1617)             | (1126)               | (191)                | (300)                 |
| <b>Clinical vulnerability</b>       |                    |                      |                      |                       |
| <b>Age</b>                          | (4819)             | (3014)               | (889)                | (916)                 |
| [18-65 years[                       | 84 [45;193] (868)  | 79 [43;208] (536)    | 92 [48;177] (157)    | 85 [45;174] (175)     |
| [65 years and older[                | 86 [48;194] (3951) | 84 [45;199] (2478)   | 91 [51;175] (732)    | 88 [52;197] (741)     |
| Missing value                       | (1617)             | (1126)               | (191)                | (300)                 |
| <b>Neuro-cardiovascular history</b> | (4819)             | (3014)               | (889)                | (916)                 |
| Absence                             | 88 [47;197] (3430) | 86 [45;204] (2128)   | 93 [51;177] (661)    | 86 [50;197] (641)     |
| Presence                            | 83 [48;184] (1389) | 76 [45;187] (886)    | 87 [49;173] (228)    | 90 [57;189] (275)     |
| Missing value                       | (1617)             | (1126)               | (191)                | (300)                 |
| <b>Social vulnerability</b>         |                    |                      |                      |                       |
| <b>Deprivation (Fdep15)</b>         | (4610)             | (2821)               | (884)                | (905)                 |
| Most advantaged                     | 87 [47;235] (743)  | 88 [46;240] (469)    | 80 [44;202] (145)    | 90 [54;239] (129)     |
| Advantaged                          | 84 [45;206] (1107) | 77 [42;216] (637)    | 97 [51;181] (235)    | 85 [48;202] (235)     |
| Intermediate                        | 87 [48;179] (831)  | 83 [46;189] (492)    | 92 [53;153] (168)    | 94 [54;188] (171)     |
| Disadvantaged                       | 86 [47;183] (903)  | 86 [46;186] (568)    | 86 [47;170] (154)    | 86 [51;179] (181)     |
| Most disadvantaged                  | 89 [52;192] (1026) | 88 [51;198] (655)    | 95 [55;175] (182)    | 82 [52;148] (189)     |
| Missing value                       | (1826)             | (1319)               | (196)                | (311)                 |

*IQR=interquartile range*

### **STEMI cohort**

In the pre-wave period, the median FMC-procedure time was longer for STEMI patients aged > 65 years than for younger patients (103 vs. 96 min). Its length increased with the degree of disadvantage (from 82 min for the most advantaged to 129 min for the most disadvantaged patients; Table 2).

The median FMC-procedure time was slightly shorter during the per-wave period than during the pre-wave period, regardless of age or neuro-cardiovascular history, but was longer for the most advantaged patients (92 vs. 82 min). This time was longer during the post-wave period than during the per-wave period, especially for elderly patients (117 vs. 101 min), those with neuro-cardiovascular history (112 vs. 89 min), and those most advantaged (119 vs. 92 min).

**Table 2. FMC-to-procedure time according to vulnerabilities and COVID-19 periods - STEMI cohort (N=2782)**

|                                     | Global<br>(N=2782)  | Pre-wave<br>(N=1868) | Per-wave<br>(N=407) | Post-wave<br>(N=507) |
|-------------------------------------|---------------------|----------------------|---------------------|----------------------|
|                                     | Median [IQR] (n)    | Median [IQR] (n)     | Median [IQR] (n)    | Median [IQR] (n)     |
| <b>All patients</b>                 | 99 [71;157] (2364)  | 100 [71;158] (1577)  | 95 [69;152] (353)   | 102 [71;153] (434)   |
| Missing value                       | (418)               | (291)                | (54)                | (73)                 |
| <b>Clinical vulnerability</b>       |                     |                      |                     |                      |
| <b>Age</b>                          | (2364)              | (1577)               | (353)               | (434)                |
| [18-65 years[                       | 95 [69;147] (1207)  | 96 [69;152] (794)    | 93 [68;134] (175)   | 94 [69;134] (238)    |
| [65 years and older[                | 105 [73;173] (1157) | 103 [74;169] (783)   | 101 [70;190] (178)  | 117 [74;167] (196)   |
| Missing value                       | (418)               | (291)                | (54)                | (73)                 |
| <b>Neuro-cardiovascular history</b> | (2364)              | (1577)               | (353)               | (434)                |
| Absence                             | 98 [71;156] (1699)  | 99 [71;157] (1115)   | 97 [70;157] (267)   | 96 [70;149] (317)    |
| Presence                            | 101 [70;159] (468)  | 102 [72;156] (318)   | 89 [61;135] (67)    | 112 [74;169] (83)    |
| Unknown                             | 98 [74;161] (197)   | 97 [73;180] (144)    | 97 [81;134] (19)    | 118 [78;154] (34)    |
| Missing value                       | (418)               | (291)                | (54)                | (73)                 |
| <b>Social vulnerability</b>         |                     |                      |                     |                      |
| <b>Deprivation (Fdep15)</b>         | (2343)              | (1565)               | (351)               | (427)                |
| Most advantaged                     | 90 [64;152] (304)   | 82 [63;149] (203)    | 92 [62;127] (48)    | 119 [79;177] (53)    |
| Advantaged                          | 91 [66;145] (551)   | 92 [68;139] (350)    | 93 [62;162] (90)    | 89 [65;150] (111)    |
| Intermediate                        | 95 [70;150] (538)   | 97 [69;156] (378)    | 91 [68;157] (71)    | 89 [72;129] (89)     |
| Disadvantaged                       | 102 [73;150] (536)  | 101 [75;154] (353)   | 94 [70;140] (82)    | 106 [73;151] (101)   |
| Most disadvantaged                  | 124 [86;204] (414)  | 129 [85;215] (281)   | 120 [90;198] (60)   | 122 [93;180] (73)    |
| Missing value                       | (439)               | (303)                | (56)                | (80)                 |

IQR=interquartile range

## Effects of the COVID-19 first wave

### Stroke cohort models

The final stroke models showed no significant association among advanced age [ $n = 4819$ ,  $\exp(\beta) = 1.08$ , 95% CI 1.00–1.16,  $p = 0.07$ ], neuro-cardiovascular history [ $n = 4610$ ,  $\exp(\beta) = 0.97$ , 95% CI 0.91–1.04,  $p = 0.44$ ], deprivation ( $n = 4606$ ,  $p = 0.30$ ), and the EU admission–imaging time, and no interaction with the COVID-19 period (age,  $p = 0.81$ ; neuro-cardiovascular history,  $p = 0.34$ ; deprivation,  $p = 0.95$ ; Figure 1).

### STEMI cohort models

Advanced age was associated with a 15% increase in the FMC–procedure time [ $n = 2364$ ,  $\exp(\beta) = 1.15$ , 95% CI 1.07–1.24,  $p < 0.001$ ]. No significant association was noted between patients' neuro-cardiovascular history and the FMC–procedure time [ $n = 2167$ ,  $\exp(\beta) = 1.08$ , 95% CI 0.98–1.19,  $p = 0.14$ ]. Compared with those in the other four quintiles, FMC–procedure times were 15–22% longer for patients in the most disadvantaged quintile ( $n = 2343$ ,  $p = 0.003$ ). No significant COVID-19 period interaction affected the relationships between the vulnerabilities studied and the FMC–procedure time (age,  $p = 0.54$ ; neuro-cardiovascular history,  $p = 0.70$ ; deprivation,  $p = 0.64$ ; Figure 2).

## DISCUSSION

### Main results

This analysis of the healthcare pathways for STEMI and stroke patients included in the CNV Registry showed that care management times for socially or clinically vulnerable patients did not worsen during

1  
2  
3 the first wave of the COVID-19 pandemic, despite changes in the access to and use and organisation of  
4 care. Nonetheless, regardless of the COVID-19 period, acute-care management times were longer for  
5 elderly and the most disadvantaged STEMI patients.  
6  
7

### 9 **Social and clinical vulnerability in stroke and STEMI management during the COVID-19** 10 **pandemic**

11 Our results are concordant with those of a study conducted in Italy, which revealed no educational or  
12 deprivation gradient for cardiovascular acute-care management times.(22) Several factors can explain  
13 the resilience of stroke and STEMI care pathways for vulnerable populations.  
14

15 First, STEMI and stroke networks in France are structured as well-defined, organised, and dedicated  
16 pathways. Highly structured patient-centered clinical pathways improve the quality of care for chronic  
17 and acute conditions with predictable trajectories.(26,27) Guidelines and national stroke and STEMI  
18 improvement programs recommend the implementation of such structured pathways, which include  
19 close collaborations between healthcare professionals and patient orientation to the EMS system and  
20 specialised technical platforms. A study of the impacts of changes in the use of care and implementation  
21 of hospital reorganisation spurred by the COVID-19 pandemic on acute management times for stroke  
22 and STEMI revealed no deep alteration of the emergency pathway construct.(12) Socially and/or  
23 clinically vulnerable populations have also benefited from the resilience of the STEMI and stroke  
24 pathways.  
25

26 Second, in the particular context of the first COVID-19 wave, the mass media widely relayed  
27 information from health institutions. The whole population was worried and very concerned about its  
28 health. Lockdown measures made people more available, and routinely exposed, to mainstream media  
29 that were highly focused on the pandemic and health messages. These factors are associated with a  
30 greater likelihood of the adoption of recommended prevention practices.(28) Thus, broad health-related  
31 media coverage may have had a positive influence on health literacy for the whole population, which  
32 may have positively influenced the use of the healthcare system.(29)  
33

34 Third, the EMS was identified as the first contact to limit exposure and regulate urgent calls during the  
35 first COVID-19 wave in France. The media relayed this information. French hospitals increased  
36 regulation capacities to face the rise in EMS calls, in an attempt to preserve access to care and the  
37 capacity to handle vital emergencies for the entire population.(30)  
38

39 Fourth, France adopted a specific strategy in March 2020 to support the economy, companies, and jobs  
40 through measures that include financial support for disadvantaged populations, salary preservation, the  
41 prohibition of layoffs, and housing assistance.(31) Associated with universal healthcare coverage, these  
42 actions may have contributed to mitigate the social consequences of the pandemic.  
43  
44

### 45 **Social and clinical vulnerability in stroke and STEMI management regardless of the COVID-19** 46 **pandemic**

1  
2  
3 Several studies, including the present work, have shown that acute-care management times are longer  
4 for elderly and socially vulnerable STEMI patients.(32–34) Concerning stroke, we found no alteration  
5 in the acute-care management time for elderly and socially vulnerable stroke patients. The results  
6 pertaining to stroke patients may be explained by our examination of the EU admission–imaging time  
7 focused on the beginning of in-hospital care. Unlike the STEMI pathway, this time involves such a small  
8 portion of stroke patients’ pathways that it could have been difficult to detect an effect.  
9

### 12 *Age*

14 Regarding specifically age for STEMI patients, greater initial clinical severity, atypical symptoms, and  
15 a longer delay in admission may explain these findings.(33) Half of the STEMI patients in our sample  
16 were aged > 65 years. The proportion of stroke patients > 65 years was 81%, which made it difficult to  
17 demonstrate an effect. To our knowledge, only one study, conducted in England, has revealed an  
18 association between older age and a longer admission–computerised tomography time for stroke  
19 patients.(35)  
20

### 23 *Socioeconomic status*

25 Findings with respect to socioeconomic status do not converge for STEMI. Biswas et al. (32) found that  
26 the median time to reperfusion in Australia, a country with universal healthcare, between 2005 and 2015  
27 was 4 min longer for lower socioeconomic quintiles than for the highest quintile. Vasaiwala et al. (34)  
28 found a direct correlation between income levels in the United States and the proportion of patients  
29 meeting the guideline-recommended door–balloon time. In contrast, Heo et al. (36) found no association  
30 between the educational level and door–balloon time in Korea. None of these studies involved control  
31 for the confounders. Additional dedicated analyses of the relationship between socioeconomic status  
32 and acute-care management time are needed, especially for elderly patients with accumulated comorbid  
33 factors due to their disadvantaged status.  
34

35 Few studies have involved the exploration of acute stroke management times according to  
36 socioeconomic status, with contrasting results explained by the specificities of healthcare systems.(3,37)  
37 In a study conducted in England, socially vulnerable patients were less likely to undergo high-quality  
38 recommended processes and more likely to undergo early supported discharge.(3) A study conducted in  
39 Sweden showed that university-educated patients were more likely to be treated than were less-educated  
40 patients.(37)  
41

### 44 *Neuro-cardiovascular history*

45 Regardless of the COVID-19 period, we found no significant influence of patients’ neuro-cardiovascular  
46 history on acute-care management times, consistent with reported findings for STEMI patients.(38) To  
47 our knowledge, no other study has evaluated this relationship for stroke care.  
48

## 51 **Implications for clinical practice and health system performance**

52 While the COVID-19 pandemic crisis is nearly resolved, our findings remain valuable for health  
53 institutions and professionals to prepare for future health crises. The structured emergency pathway for  
54  
55  
56  
57  
58  
59  
60

1  
2  
3 strokes and STEMI patients and hospital reorganisations ensured sustained care quality.(12) In our  
4 study, the COVID-19 crisis did not have any differential impact on social health inequalities, suggesting  
5 a good resilience of the French healthcare network. Organisational strategies employed, such as a  
6 dedicated life-threatening emergency pathway, transversal reorganisations aiming at concentrating  
7 resources on emergency care (12), targeted communication, and increased regulation capacities, could  
8 be replicated in new crises and extended to other conditions. Pre-existing STEMI management  
9 inequalities partly result from the healthcare system organisation. In a study about disparities in  
10 cardiovascular disease, these inequalities are linked to language challenges, health literacy, implicit bias,  
11 and the absence of culturally competent care.(8) This may lead to less accurate medical interviews and  
12 suboptimal medical decisions. Further research is essential to investigate these hypotheses and evaluate  
13 potential corrective measures.  
14  
15  
16  
17  
18  
19  
20  
21

### 22 **Strengths and weaknesses**

23 Our study, one of the first to examine the effects of the COVID-19 crisis on the quality of care for  
24 STEMI and stroke patients in Europe with consideration of health and social inequalities, involved the  
25 parallel analysis of two high-quality databases containing data on large numbers of stroke and STEMI  
26 patients managed in a large panel of care structures in the Aquitaine region.  
27  
28  
29

30 Our study has some limitations, particularly with regard to the population. The study area was limited  
31 to the Aquitaine region, one of the regions least affected by the first wave of the COVID-19  
32 pandemic.(39) This situation could have led to the exertion of less pressure on health services (especially  
33 the EMS, STEMI, and stroke network). Arguments support the sample's representativeness for stroke  
34 and STEMI patients in hospitals during this period, making our results likely applicable to all of France.  
35 First, a stroke study showed that the use of care was similar regardless of pandemic intensity.(40)  
36 Second, a previous study with the same database highlighted results consistent with other French studies  
37 on the evolution of stroke and STEMI patient admissions.(12) Third, characteristics and acute  
38 management times for stroke and STEMI patients in the 'CNV registry' align with those in other French  
39 regions. It would be interesting to repeat the study in another region, or in another country more affected  
40 by the pandemic, to test the external validity of the results.  
41  
42  
43  
44  
45  
46

47 Moreover, patients who did not enter the healthcare system because they had died or did not benefit  
48 from hospital care, as well as STEMI patients with symptoms for >24 h, were not included. The  
49 exclusion of these patients may have generated selection bias, and prevented us from quantifying the  
50 phenomenon of healthcare system avoidance that could be supposed to be more frequent among socially  
51 and/or clinically vulnerable patients during the COVID-19 crisis, as stated in a Danish study;(41) it also  
52 entails the risk that increases in the delay to use of care were underestimated for some patient subgroups.  
53 A French study revealed a 24% decrease in emergency consultations for STEMI and an 18% decrease  
54 for stroke.(42) However, a national survey analysed the characteristics associated with not seeking care,  
55 in 2017 and 2020 , revealing factors such as younger age, foreign nationality, living alone, and lack of  
56  
57  
58  
59  
60



1  
2  
3 general practitioner care.(43) The proportion of patients not seeking care increased during COVID-19  
4 pandemic, but the population was not significantly different from the one before, suggesting a limited  
5 selection bias.  
6

7  
8 Our explanatory analyses yield robust results, with the inclusion of appropriate confounding variables  
9 identified by the DAG method. The large panel of data collected enabled the integration of a wide variety  
10 of confounders, including clinical characteristics and socio-geographical factors.  
11

12 Given the lack of individual-level socioeconomic data in the CNV Registry, which prevented the  
13 assignment of social determinants for each patient, we used a residence area-based measure, which is a  
14 major limitation of our study. However, we determined deprivation indices using a validated tool that  
15 has been used in many studies conducted in France.(24) Moreover, the socio-ecological measure of  
16 deprivation tends to underestimate social inequalities observed using individual data; thus, caution is  
17 advised when attributing group-level estimates to individuals.(6) Additional limitations of this study  
18 include our inability to include all clinical risk factors of severe COVID-19 and information about  
19 patients' educational levels, individual resources, and social support to further explore their  
20 precariousness and health literacy. The COVID-19 pandemic may have had a greater impact on the  
21 access to and quality of care for the most precarious individuals.  
22

23  
24 A major methodological issue of this study is that we defined the per-wave period according to the  
25 implementation of healthcare reorganisation and transformation of societal functioning to fight the  
26 COVID-19 pandemic.(12) We began the per-wave period at the time of the first hospital reorganisation  
27 implementation and ended it at the time of lockdown lifting. Although data for the CNV Registry are  
28 collected continuously, we terminated the follow-up period at the end of August 2020 to enable the  
29 timely reporting of results.  
30

31  
32 Finally, we did not explore gender as a distinct vulnerable group(9) and short- or long-term outcomes  
33 such as morbidity, mortality, disability, or rehospitalisation after initial hospitalisation for STEMI or  
34 stroke, for which a wide range of socioeconomic disparities exist.(3,41) Separate studies on gender  
35 inequalities and inequalities following acute care are currently underway, with a focus on the COVID  
36 period.  
37

### 38 **Conclusions**

39  
40 The first wave of the COVID-19 pandemic induced no deep change in management times for the most  
41 socially and/or clinically vulnerable stroke and STEMI patients. Pre-existing inequalities in care  
42 management times observed for elderly and most disadvantaged STEMI patients, were neither  
43 aggravated nor reduced by changes in the use of care or implementation of hospital reorganisation  
44 spurred by the pandemic. These encouraging results may be explained by the well-structured STEMI  
45 and stroke networks in France and the reorganisation of the healthcare structure to preserve access and  
46 the capacity to care for vital emergencies using the EMS. Additional studies are required to explore  
47 findings related to social health inequalities in STEMI management.  
48  
49  
50  
51  
52  
53  
54  
55  
56  
57  
58  
59  
60

- **Figure Legend/Caption**

**Figure 1. Estimation of each clinical and social factor (95% confidence interval) on emergency unit admission-to-imaging time.**

Estimated overall effects expressed as  $\exp(\beta)$  with 95% CI; results of multivariate linear regression mixed models; variable to be explained:  $Y = \log(\text{emergency unit admission-to-imaging time})$ ; (A) results adjusted on period and gender; (B) cardiovascular history was a history of stroke, transient ischemic attack, coronary artery disease, or myocardial infarction; results adjusted on period, age, gender, diabetes and smoking as risk factors, deprivation index; (C) the reference modality for the deprivation index Fdep15 in five categories was “most disadvantaged”; results adjusted on period, age, gender, country of birth, urbanicity of residence.

**Figure 2. Estimation of each clinical and social factor (95% confidence interval) on FMC-to-procedure time.**

Estimated overall effects expressed as  $\exp(\beta)$  with 95% CI; results of multivariate linear regression mixed models; variable to be explained:  $Y = \log(\text{FMC-to-procedure time})$ ; (A) results adjusted on period and gender; (B) cardiovascular history was a history of stroke, transient ischemic attack, coronary artery disease, or myocardial infarction; results adjusted on period, age, gender, diabetes, hypertension, dyslipidemia, obesity and smoking as risk factors; (C) the reference modality for the deprivation index Fdep15 in five categories was “most disadvantaged”; results adjusted on period, age, gender, country of birth, urbanicity of residence.

- **Data sharing statement**

Deidentified participant data will be available upon reasonable request. Proposals may be submitted to the corresponding author. Data requestors will need to sign a data access agreement

- **Patient consent for publication**

Not applicable.

- **Ethics statements**

The CNV registry was approved by the French authority on data protection “Commission Nationale Informatique et Libertés” (file 2216283) and the study by the Bordeaux University Hospital Ethics Board (CER–BDX 2023–131). All patients received individual information before inclusion in the Registry. The study is based on the secondary use of health data and does not involve human participants. A signed patient consent is not required.

- **Authors’ contributions**

EL, FF, SD, FSa and FSe were responsible for the study concept and design. EL and FF conducted the literature review. EL and FSe had full access to all of the data and takes responsibility for their integrity and accuracy. SD and SMH performed the statistical analysis. FSa, EL, SD, FF, FSe, SV, LC, PC, FR,

1  
2  
3 IS, CP interpreted the data. EL, FF, SV, FSa and SD wrote the manuscript. FSe, LC, PC, FR, IS and CP  
4 critically reviewed the manuscript.  
5

6  
7 • **Competing interests statement**

8 The authors declare that they have no competing interests with this study.  
9

10 • **Funding statement**

11 This work was supported by "Alliance Tous unis contre le virus", which includes the "Fondation de  
12 France", the "AP-HP" and the "Institut Pasteur" grant number 00107870 and the "Nouvelle-Aquitaine  
13 Regional Health Agency" (no grant number).  
14

15 • **Acknowledgments**

16 We thank funders of the project ("Alliance Tous unis contre le virus", which includes the "Fondation de  
17 France", the "AP-HP" and the "Institut Pasteur"), of the CNV registry ("Nouvelle-Aquitaine Regional  
18 Health Agency"), the CNV registry team (Charlotte Boureau, Mathilde Borg, Sandrine Domecq, Céline  
19 Dupuis, Florian Gilbert, Cristelle Gill, Leslie Larco, Jean-Pierre Legrand, Mélanie Maugeais, Sahal  
20 Miganeh-Hadi, Corinne Perez, Olivia Rick, Floriane Sevin), Julien Asselineau, Vincent Bouteloup,  
21 Moufid Hajjar, Marion Kret, Vincent Thevenet, Rodolphe Thiebaut, the AVICOVID group (Dr Ansart  
22 Emma, Dr Argacha Isabelle, Dr Baha Leila, Dr Bakpa Djoumana, Dr Bannier Stéphanie, Dr Banos Jean-  
23 Luc, Dr Bartou Christine, Dr Bataille Bertrand, Dr Berge Jérôme, Dr Bernady Patricia, Dr Bidian Sorina,  
24 Dr Bordier Philippe, Dr Casenave Philippe, Dr Casteigt Francois, Dr Chartroule Véronique, Dr  
25 Chazalon Cécile, Dr Cherhabil Nidhal, Dr Claveries Paul, Pr Combes Xavier, Dr Coustere Jean-baptiste,  
26 Dr Dan Maria, Dr Darraillans Didier, Dr Delarche Nicolas, Dr Delonglee Virginie, Dr Demasles  
27 Stéphanie, Dr Eclancher Anncy, Dr Ellie Emmanuel, Dr Fabre Jean, Dr Faucheux Jean-Marc, Dr  
28 Ferraton Lucie, Dr Fort Pierre-Arnaud, Dr Fournier Pierre, Dr Goulois Nathalie, Dr Goze-Dupuy  
29 Catherine, Dr Hassan Akil, Dr Heydel Virginie, Dr Higue David, Dr Hostyn Véronique, Dr Hubrecht  
30 Régis, Dr Jarnier Philippe, Dr Karsenty Bernard, Dr Lacrouts Marc, Dr Laplace Guillaume, Dr  
31 Larnaudie Bernard, Dr Lavocat Hélène, Dr Leca Radu Eléna, Dr Lefevre Brice, Dr Leymarie Jean-  
32 Louis, Dr Leyral Hervé, Dr Liepa Marie-Pierre, Dr Lorendeau Jean-Paul, Dr Lucas Ludovic, Dr Maillard  
33 Laurent, Dr Maisonnave Vincent, Dr Marnat Gaultier, Dr Marque Nicolas, Dr Martinez Miquel, Dr  
34 Mostefai Yousra, Dr Ngounou Fogue Chancel, Dr Nocon Claire, Dr Ondze Basile, Dr Orcival François,  
35 Dr Papin Jérémy, Dr Péron Julie, Dr Perron Jean-Marie, Dr Py Emmanuel, Dr Scouarnec Catherine, Dr  
36 Dr Seignolles Gaëlle, Dr Senis Frédéric, Dr Tahon Bertrand, Dr Tarak Mokni, Dr Tidahy Eliane, Dr  
37 Touchard Philippe, Dr Trogoff Bruno, Dr Verhoeven Luc, Dr Wong So Laurent) and all healthcare  
38 professionals participating in the CNV registry.  
39  
40  
41  
42  
43  
44  
45  
46  
47  
48  
49  
50  
51  
52  
53  
54  
55  
56  
57  
58  
59  
60

**REFERENCES**

1. Neumann FJ, Sousa-Uva M, Ahlsson A, Alfonso F, Banning AP, Benedetto U, et al. 2018 ESC/EACTS Guidelines on myocardial revascularization. *EuroIntervention*. 20 févr 2019;14(14):1435-534.
2. Terkelsen CJ, Sørensen JT, Maeng M, Jensen LO, Tilsted HH, Trautner S, et al. System delay and mortality among patients with STEMI treated with primary percutaneous coronary intervention. *JAMA*. 18 août 2010;304(7):763-71.
3. Bray BD, Paley L, Hoffman A, James M, Gompertz P, Wolfe CDA, et al. Socioeconomic disparities in first stroke incidence, quality of care, and survival: a nationwide registry-based cohort study of 44 million adults in England. *The Lancet Public Health*. avr 2018;3(4):e185-93.
4. Simoni AH, Frydenlund J, Kragholm KH, Bøggild H, Jensen SE, Johnsen SP. Socioeconomic inequity in incidence, outcomes and care for acute coronary syndrome: A systematic review. *International Journal of Cardiology*. juin 2022;356:19-29.
5. Schultz WM, Kelli HM, Lisko JC, Varghese T, Shen J, Sandesara P, et al. Socioeconomic Status and Cardiovascular Outcomes. *Circulation*. 15 mai 2018;137(20):2166-78.
6. Schröder SL, Richter M, Schröder J, Frantz S, Fink A. Socioeconomic inequalities in access to treatment for coronary heart disease: A systematic review. *Int J Cardiol*. 15 sept 2016;219:70-8.
7. Kucharska-Newton AM, Harald K, Rosamond WD, Rose KM, Rea TD, Salomaa V. Socioeconomic indicators and the risk of acute coronary heart disease events: comparison of population-based data from the United States and Finland. *Ann Epidemiol*. août 2011;21(8):572-9.
8. Javed Z, Haisum Maqsood M, Yahya T, Amin Z, Acquah I, Valero-Elizondo J, et al. Race, Racism, and Cardiovascular Health: Applying a Social Determinants of Health Framework to Racial/Ethnic Disparities in Cardiovascular Disease. *Circ Cardiovasc Qual Outcomes*. janv 2022;15(1):e007917.
9. Kiss P, Carcel C, Hockham C, Peters SAE. The impact of the COVID-19 pandemic on the care and management of patients with acute cardiovascular disease: a systematic review. *Eur Heart J Qual Care Clin Outcomes*. 25 janv 2021;7(1):18-27.
10. Chew NW, Ow ZGW, Teo VXY, Heng RRY, Ng CH, Lee CH, et al. The Global Impact of the COVID-19 Pandemic on STEMI care: A Systematic Review and Meta-Analysis. *Can J Cardiol*. 10 avr 2021;S0828-282X(21)00179-3.
11. Zhao J, Li H, Kung D, Fisher M, Shen Y, Liu R. Impact of the COVID-19 Epidemic on Stroke Care and Potential Solutions. *Stroke*. juill 2020;51(7):1996-2001.
12. Lesaine E, Francis-Oliviero F, Domecq S, Bijon M, Cetrin L, Coste P, et al. Effects of healthcare system transformations spurred by the COVID-19 pandemic on management of stroke and STEMI: a registry-based cohort study in France. *BMJ Open*. 1 sept 2022;12(9):e061025.
13. Siegler JE, Zha AM, Czap AL, Ortega-Gutierrez S, Farooqui M, Liebeskind DS, et al. Influence of the COVID-19 Pandemic on Treatment Times for Acute Ischemic Stroke. *Stroke*. janv 2021;52(1):40-7.
14. Bambra C, Riordan R, Ford J, Matthews F. The COVID-19 pandemic and health inequalities. *J Epidemiol Community Health*. 13 juin 2020;jech-2020-214401.

15. Khanijahani A, Iezadi S, Gholipour K, Azami-Aghdash S, Naghibi D. A systematic review of racial/ethnic and socioeconomic disparities in COVID-19. *International Journal for Equity in Health*. 24 nov 2021;20(1):248.
16. Horton R. Offline: COVID-19 is not a pandemic. *The Lancet*. sept 2020;396(10255):874.
17. Magesh S, John D, Li WT, Li Y, Mattingly-app A, Jain S, et al. Disparities in COVID-19 Outcomes by Race, Ethnicity, and Socioeconomic Status: A Systematic Review and Meta-analysis. *JAMA Network Open*. 11 nov 2021;4(11):e2134147.
18. Green H, Fernandez R, MacPhail C. The social determinants of health and health outcomes among adults during the COVID-19 pandemic: A systematic review. *Public Health Nurs*. nov 2021;38(6):942-52.
19. Vandentorren S, Smaïli S, Chatignoux E, Maurel M, Alleaume C, Neufcourt L, et al. The effect of social deprivation on the dynamic of SARS-CoV-2 infection in France: a population-based analysis. *The Lancet Public Health*. 1 mars 2022;7(3):e240-9.
20. Chauvin F. Actualisation de l'avis relatif aux personnes à risque de forme grave de Covid-19 et aux mesures barrières spécifiques à ces publics [Internet]. Haut Conseil de la santé publique; 2020 avr [cité 18 mai 2022] p. 10. Disponible sur: <https://www.hcsp.fr/explore.cgi/avisrapportsdomaine?clefr=807>
21. Naylor-Wardle J, Rowland B, Kunadian V. Socioeconomic status and cardiovascular health in the COVID-19 pandemic. *Heart*. 1 mars 2021;107(5):358-65.
22. Di Girolamo C, Gnani R, Landriscina T, Forni S, Falcone M, Calandrini E, et al. Indirect impact of the COVID-19 pandemic and its containment measures on social inequalities in hospital utilisation in Italy. *J Epidemiol Community Health*. 12 mai 2022;jech-2021-218452.
23. Lesaine E, Saillour-Glenisson F, Leymarie JL, Jamet I, Fernandez L, Perez C, et al. The ACIRA Registry: A Regional Tool to Improve the Healthcare Pathway for Patients Undergoing Percutaneous Coronary Interventions and Coronary Angiographies in the French Aquitaine Region: Study Design and First Results. *Crit Pathw Cardiol*. mars 2020;19(1):1-8.
24. Rey G, Jouglu E, Fouillet A, Hémon D. Ecological association between a deprivation index and mortality in France over the period 1997 – 2001: variations with spatial scale, degree of urbanicity, age, gender and cause of death. *BMC Public Health*. 22 janv 2009;9:33.
25. Arah OA, Westert GP, Hurst J, Klazinga NS. A conceptual framework for the OECD Health Care Quality Indicators Project. *Int J Qual Health Care*. sept 2006;18 Suppl 1:5-13.
26. Allen D, Gillen E, Rixson L. Systematic review of the effectiveness of integrated care pathways: what works, for whom, in which circumstances? *Int J Evid Based Healthc*. juin 2009;7(2):61-74.
27. Trimarchi L, Caruso R, Magon G, Odone A, Arrigoni C. Clinical pathways and patient-related outcomes in hospital-based settings: a systematic review and meta-analysis of randomized controlled trials. *Acta Biomed*. 9 févr 2021;92(1):e2021093.
28. Lin L, Savoia E, Agboola F, Viswanath K. What have we learned about communication inequalities during the H1N1 pandemic: a systematic review of the literature. *BMC Public Health*. 21 mai 2014;14:484.
29. Peltzer S, Hellstern M, Genske A, Jünger S, Woopen C, Albus C. Health literacy in persons at risk of and patients with coronary heart disease: A systematic review. *Soc Sci Med*. janv 2020;245:112711.

- 1
- 2
- 3 30. Guide méthodologique « préparation à la phase épidémique de COVID-19 des établissements de
- 4 santé, de la médecine de ville et des établissements et services médico-sociaux » du 16 mars
- 5 2020 [Internet]. 2020 mars [cité 24 juin 2022] p. 47. Disponible sur: [https://www.nouvelle-](https://www.nouvelle-aquitaine.ars.sante.fr/guide-methodologique-preparation-la-phase-epidémique-de-covid-19-des-etablissements-de-sante-de-la)
- 6 [aquitaine.ars.sante.fr/guide-methodologique-preparation-la-phase-epidémique-de-covid-19-des-](https://www.nouvelle-aquitaine.ars.sante.fr/guide-methodologique-preparation-la-phase-epidémique-de-covid-19-des-etablissements-de-sante-de-la)
- 7 [etablissements-de-sante-de-la](https://www.nouvelle-aquitaine.ars.sante.fr/guide-methodologique-preparation-la-phase-epidémique-de-covid-19-des-etablissements-de-sante-de-la)
- 8
- 9 31. Math A. Quoi qu'il en coûte. Des mesures incomparables pour faire face aux conséquences
- 10 économiques de la pandémie ? - IRES. *Chronique internationale de l'IRES*. 2021;(176):8-31.
- 11
- 12 32. Biswas S, Andrianopoulos N, Duffy SJ, Lefkovits J, Brennan A, Walton A, et al. Impact of
- 13 Socioeconomic Status on Clinical Outcomes in Patients With ST-Segment-Elevation Myocardial
- 14 Infarction. *Circ Cardiovasc Qual Outcomes*. janv 2019;12(1):e004979.
- 15
- 16 33. Nguyen HL, Saczynski JS, Gore JM, Goldberg RJ. Age and Sex Differences in Duration of Pre-
- 17 hospital Delay in Patients with Acute Myocardial Infarction: A Systematic Review. *Circ*
- 18 *Cardiovasc Qual Outcomes*. janv 2010;3(1):82-92.
- 19
- 20 34. Vasaiwala S, Vidovich M. Impact of socioeconomic status on guideline-recommended care for
- 21 ST-elevation myocardial infarction in the United States. *Int J Cardiol*. 3 sept 2010;143(3):424-5.
- 22
- 23 35. Myint PK, Kidd AC, Kwok CS, Musgrave SD, Redmayne O, Metcalf AK, et al. Time to
- 24 Computerized Tomography Scan, Age, and Mortality in Acute Stroke. *J Stroke Cerebrovasc Dis*.
- 25 déc 2016;25(12):3005-12.
- 26
- 27 36. Heo JY, Hong KJ, Shin SD, Song KJ, Ro YS. Association of educational level with delay of
- 28 prehospital care before reperfusion in STEMI. *Am J Emerg Med*. déc 2015;33(12):1760-9.
- 29
- 30 37. Stecksén A, Glader EL, Asplund K, Norrving B, Eriksson M. Education Level and Inequalities
- 31 in Stroke Reperfusion Therapy. *Stroke*. sept 2014;45(9):2762-8.
- 32
- 33 38. Feng L, Li M, Xie W, Zhang A, Lei L, Li X, et al. Prehospital and in-hospital delays to care and
- 34 associated factors in patients with STEMI: an observational study in 101 non-PCI hospitals in
- 35 China. *BMJ Open*. 10 nov 2019;9(11):e031918.
- 36
- 37 39. Olié V, Carcaillon-Bentata L, Thiam MM, Haeghebaert S, Caserio-Schönemann C. Emergency
- 38 department admissions for myocardial infarction and stroke in France during the first wave of
- 39 the COVID-19 pandemic: National temporal trends and regional disparities. *Archives of*
- 40 *Cardiovascular Diseases*. avr 2021;114(5):371-80.
- 41
- 42 40. Kansagra AP, Goyal MS, Hamilton S, Albers GW. Collateral Effect of Covid-19 on Stroke
- 43 Evaluation in the United States. *New England Journal of Medicine*. 23 juill 2020;383(4):400-1.
- 44
- 45 41. Andersen J, Strandberg-Larsen K, Gerds T, Gislason G, Torp-Pedersen C, Blanche P, et al. Risk
- 46 of major cardiovascular events according to educational level before and after the initial
- 47 COVID-19 public lockdown: a nationwide study. *J Epidemiol Community Health*. févr
- 48 2021;jech-2020-215133.
- 49
- 50 42. Thiam MM, Olié V, Carcaillon-Bentata L, Haeghebaert S, Caserio-Schonemann C. Dynamique
- 51 des admissions aux urgences pour infarctus du myocarde et accident vasculaire cérébral durant la
- 52 première vague de COVID-19 en France. *Santé Publique*. 2022;34(HS1):13b-13b.
- 53
- 54 43. Douillet D, Dupont C, Leloup N, Ménager G, Delori M, Soulie C, et al. Prevalence and
- 55 characterization of forgoing care: comparison of two prospective multicentre cohorts between
- 56 pre-COVID-19 era and a lockdown period. *Archives of Public Health*. 19 janv 2022;80(1):32.
- 57
- 58
- 59
- 60

**Stroke Cohort**

(A) Model "age over 65 years old" (N=4,819)



(B) Model "cardiovascular history" (N=4,610)



(C) Model "deprivation index - Fdep15" (N=4,606)



**Figure 1. Estimation of each clinical and social factor (95% confidence interval) on emergency unit admission-to-imaging time.**

Estimated overall effects expressed as  $\exp(\beta)$  with 95% CI; results of multivariate linear regression mixed models; variable to be explained:  $Y = \log(\text{emergency unit admission-to-imaging time})$ ; (A) results adjusted on period and gender; (B) cardiovascular history was a history of stroke, transient ischemic attack, coronary artery disease, or myocardial infarction; results adjusted on period, age, gender, diabetes and smoking as risk factors, deprivation index; (C) the reference modality for the deprivation index Fdep15 in five categories was "most disadvantaged"; results adjusted on period, age, gender, country of birth, urbanicity of residence.

**STEMI Cohort****(A) Model "age over 65 years old" (N=2,364)****(B) Model "cardiovascular history" (N=2,167)****(C) Model "deprivation index - Fdep15" (N=2,343)****Figure 2. Estimation of each clinical and social factor (95% confidence interval) on FMC-to-procedure time.**

Estimated overall effects expressed as  $\exp(\beta)$  with 95% CI; results of multivariate linear regression mixed models; variable to be explained:  $Y = \log(\text{FMC-to-procedure time})$ ; (A) results adjusted on period and gender; (B) cardiovascular history was a history of stroke, transient ischemic attack, coronary artery disease, or myocardial infarction; results adjusted on period, age, gender, diabetes, hypertension, dyslipidemia, obesity and smoking as risk factors; (C) the reference modality for the deprivation index Fdep15 in five categories was "most disadvantaged"; results adjusted on period, age, gender, country of birth, urbanicity of residence.



Supplementary material 1.

Conceptual framework

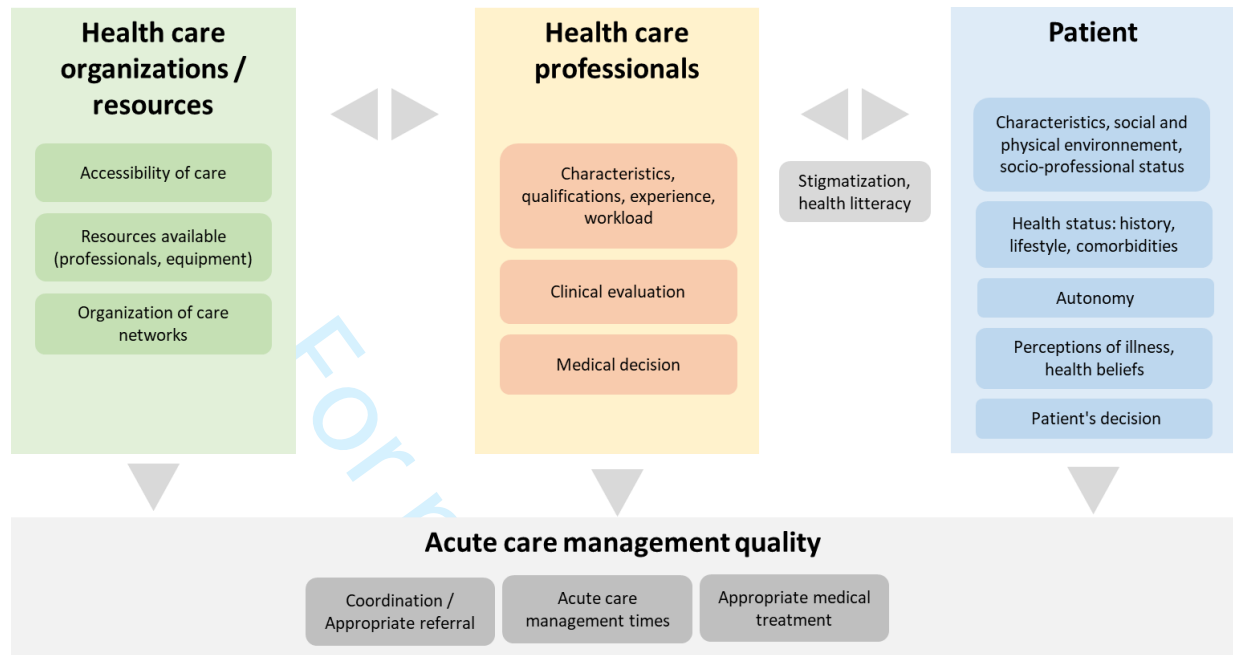

## Classification of the variables according to the conceptual framework and used for the directed acyclic graphs (DAG)

Variables identified in the literature and available in the databases were classified into each dimension. Selected confounders were then identified by six DAG, one for each model. We forced adjustment for age and gender.

### Stroke cohort



### STEMI cohort



In bold: exposure variables,

CABG=coronary artery bypass graft, EMS=emergency medical service, PCI= percutaneous coronary intervention, STEMI=segment elevation myocardial infarction.

**Confounders introduced in the stroke and STEMI final models estimating the association between clinical and social vulnerabilities effects on care management times**

| <b>Category of exposure</b>         | <b>STEMI cohort Models</b>                                                                                                               | <b>Stroke Cohort Models</b>                                                                                 |
|-------------------------------------|------------------------------------------------------------------------------------------------------------------------------------------|-------------------------------------------------------------------------------------------------------------|
| <b>Age</b>                          | Gender, hospital (random effect), health territory (random effect)                                                                       | Gender, hospital (random effect), health territory (random effect)                                          |
| <b>Neuro-cardiovascular history</b> | Age, gender, diabetes mellitus, hypertension, dyslipidemia, obesity, smoking, hospital (random effect), health territory (random effect) | Age, gender, diabetes mellitus, smoking, FDep15, hospital (random effect), health territory (random effect) |
| <b>Fdep 15</b>                      | Age, gender, country of birth, hospital (random effect), health territory (random effect)                                                | Age, gender, urbanicity, country of birth, hospital (random effect), health territory (random effect)       |

FDep15=deprivation index; STEMI=segment elevation myocardial infarction; urbanicity of residence: urban of the patient's residence area defined as commune or group of communes with a continuous built-up area with at least 2,000 inhabitants.

## Supplementary material 2.

## Description of the stroke and STEMI cohorts study sample (N=9,218)

|                                                             |                      | Stroke cohort<br>(N=6,436) |        | STEMI cohort<br>(N=2,782) |        |
|-------------------------------------------------------------|----------------------|----------------------------|--------|---------------------------|--------|
|                                                             |                      | n                          | (%)    | n                         | Median |
| <b>Patient socio-demographic characteristics</b>            |                      |                            |        |                           |        |
| <b>Sexe</b>                                                 |                      |                            |        |                           |        |
|                                                             | Male                 | 3533                       | (54.9) | 2033                      | (73.1) |
|                                                             | Female               | 2903                       | (45.1) | 749                       | (26.9) |
| <b>Age</b>                                                  |                      |                            |        |                           |        |
|                                                             | [18-65 years[        | 1201                       | (18.7) | 1381                      | (49.7) |
|                                                             | [65 years and older[ | 5235                       | (81.3) | 1395                      | (50.3) |
|                                                             | Missing values       |                            |        | 6                         |        |
| <b>Urbanicity</b>                                           |                      |                            |        |                           |        |
|                                                             | Urban                | 4,451                      | (72.3) | 1,843                     | (72.5) |
|                                                             | Rural                | 1,702                      | (27.7) | 700                       | (27.5) |
|                                                             | Missing values       | 283                        |        | 239                       |        |
| <b>Accessibility to general practitioners (APL MG 2018)</b> |                      |                            |        |                           |        |
|                                                             | [0 - 3,1[            | 989                        | (16.0) | 399                       | (15.7) |
|                                                             | [3,1 - 3,8[          | 1139                       | (18.5) | 460                       | (18.1) |
|                                                             | [3,8 - 4,7[          | 1939                       | (31.4) | 773                       | (30.5) |
|                                                             | [4,7 et plus]        | 2104                       | (34.1) | 905                       | (35.7) |
|                                                             | Missing values       | 265                        |        | 245                       |        |
| <b>Deprivation (Fdep15)</b>                                 |                      |                            |        |                           |        |
|                                                             | Most advantaged      | 994                        | (16.2) | 325                       | (12.8) |
|                                                             | Advantaged           | 1522                       | (24.8) | 596                       | (23.5) |
|                                                             | Intermediate         | 1115                       | (18.1) | 578                       | (22.8) |
|                                                             | Disadvantaged        | 1185                       | (19.3) | 578                       | (22.8) |
|                                                             | Most disadvantaged   | 1329                       | (21.6) | 460                       | (18.1) |
|                                                             | Missing values       | 291                        |        | 245                       |        |
| <b>Patient clinical history and risk factors</b>            |                      |                            |        |                           |        |
| <b>Neuro-cardiovascular history</b>                         |                      |                            |        |                           |        |
|                                                             | Absence              | 4594                       | (71.4) | 1822                      | (65.5) |
|                                                             | Presence             | 1842                       | (28.6) | 569                       | (20.5) |
|                                                             | Unknown              |                            |        | 391                       | (14.0) |
| <b>Coronary artery disease or STEMI history</b>             |                      |                            |        |                           |        |
|                                                             | No                   | 5660                       | (87.9) | 2,031                     | (73.0) |
|                                                             | Yes                  | 776                        | (12.1) | 530                       | (19.1) |
|                                                             | Unknown              |                            |        | 221                       | (7.9)  |
| <b>Coronary artery disease</b>                              |                      |                            |        |                           |        |
|                                                             | Absence              | 5,877                      | (91.3) |                           |        |
|                                                             | Presence             | 559                        | (8.7)  |                           |        |
| <b>Previous STEMI</b>                                       |                      |                            |        |                           |        |
|                                                             | Absence              | 6,057                      | (94.1) |                           |        |
|                                                             | Presence             | 379                        | (5.9)  |                           |        |
| <b>Previous stroke or transient ischemic attack</b>         |                      |                            |        |                           |        |
|                                                             | Absence              | 5,166                      | (80.3) |                           |        |
|                                                             | Presence             | 1,270                      | (19.7) |                           |        |
| <b>Peripheral arterial disease</b>                          |                      |                            |        |                           |        |
|                                                             | No                   | 6,144                      | (95.5) | 2,245                     | (80.7) |
|                                                             | Yes                  | 292                        | (4.5)  | 70                        | (2.5)  |
|                                                             | Unknown              |                            |        | 467                       | (16.8) |
| <b>Chronic renal failure</b>                                |                      |                            |        |                           |        |
|                                                             | No                   |                            |        | 2,782                     |        |
|                                                             | Yes                  |                            |        | 2,264                     | (81.4) |
|                                                             | Unknown              |                            |        | 47                        | (1.7)  |
| <b>Atrial fibrillation</b>                                  |                      |                            |        |                           |        |
|                                                             | Absence              | 5,348                      | (83.1) |                           |        |
|                                                             | Presence             | 1,088                      | (16.9) |                           |        |
| <b>Cardiac failure</b>                                      |                      |                            |        |                           |        |
|                                                             | Absence              | 6,114                      | (95.0) |                           |        |
|                                                             | Presence             | 322                        | (5.0)  |                           |        |

|                                                    |          |       |        |       |        |
|----------------------------------------------------|----------|-------|--------|-------|--------|
| <b>Obesity</b>                                     |          |       |        | 2,782 |        |
|                                                    | Absence  |       |        | 1801  | (64.7) |
|                                                    | Presence |       |        | 513   | (18.4) |
|                                                    | Unknown  |       |        | 468   | (16.8) |
| <b>Diabetes mellitus</b>                           |          | 6,436 |        | 2,782 |        |
|                                                    | No       | 5,198 | (80.8) | 2,119 | (76.2) |
|                                                    | Yes      | 1,238 | (19.2) | 414   | (12.9) |
|                                                    | Unknown  |       |        | 249   | (9.0)  |
| <b>Arterial hypertension</b>                       |          | 6,436 |        | 2,782 |        |
|                                                    | No       | 2,419 | (37.6) | 1,278 | (45.9) |
|                                                    | Yes      | 4,017 | (62.4) | 1,356 | (48.7) |
|                                                    | Unknown  |       |        | 148   | (5.3)  |
| <b>Dyslipidemia</b>                                |          | 6,436 |        | 2,782 |        |
|                                                    | No       | 4,618 | (71.8) | 1,708 | (61.4) |
|                                                    | Yes      | 1,818 | (28.2) | 887   | (31.9) |
|                                                    | Unknown  |       |        | 187   | (6.7)  |
| <b>Active smoking</b>                              |          | 6,436 |        | 2,782 |        |
|                                                    | No       | 5,103 | (79.3) | 1,194 | (42.9) |
|                                                    | Yes      | 1,333 | (20.7) | 1,163 | (41.8) |
|                                                    | Unknown  |       |        | 425   | (15.3) |
| <b>Familial history of coronary artery disease</b> |          |       |        | 2,782 |        |
|                                                    | No       |       |        | 2070  | (74.4) |
|                                                    | Yes      |       |        | 455   | (16.4) |
|                                                    | Unknown  |       |        | 257   | (9.2)  |

APL MG=potential accessibility to general practitioners, STEMI=segment elevation myocardial infarction.

**STROBE Statement—Checklist of items that should be included in reports of cohort studies**

|                              | <b>Item No</b> | <b>Recommendation</b>                                                                                                                                                                             | <b>Page No</b>           |
|------------------------------|----------------|---------------------------------------------------------------------------------------------------------------------------------------------------------------------------------------------------|--------------------------|
| <b>Title and abstract</b>    | 1              | (a) Indicate the study's design with a commonly used term in the title or the abstract                                                                                                            | ok, page 1,2             |
|                              |                | (b) Provide in the abstract an informative and balanced summary of what was done and what was found                                                                                               | ok, page 2               |
| <b>Introduction</b>          |                |                                                                                                                                                                                                   |                          |
| Background/rationale         | 2              | Explain the scientific background and rationale for the investigation being reported                                                                                                              | ok, page 4               |
| Objectives                   | 3              | State specific objectives, including any prespecified hypotheses                                                                                                                                  | ok, page 6               |
| <b>Methods</b>               |                |                                                                                                                                                                                                   |                          |
| Study design                 | 4              | Present key elements of study design early in the paper                                                                                                                                           | ok, page 6               |
| Setting                      | 5              | Describe the setting, locations, and relevant dates, including periods of recruitment, exposure, follow-up, and data collection                                                                   | ok, pages 6              |
| Participants                 | 6              | (a) <i>Cohort study</i> —Give the eligibility criteria, and the sources and methods of selection of participants. Describe methods of follow-up                                                   | ok, pages 6              |
|                              |                | (b) <i>Cohort study</i> —For matched studies, give matching criteria and number of exposed and unexposed                                                                                          | NA                       |
| Variables                    | 7              | Clearly define all outcomes, exposures, predictors, potential confounders, and effect modifiers. Give diagnostic criteria, if applicable                                                          | ok, pages 6,7            |
| Data sources/<br>measurement | 8*             | For each variable of interest, give sources of data and details of methods of assessment (measurement). Describe comparability of assessment methods if there is more than one group              | ok, pages 6,7            |
| Bias                         | 9              | Describe any efforts to address potential sources of bias                                                                                                                                         | ok, page 6,7,8           |
| Study size                   | 10             | Explain how the study size was arrived at                                                                                                                                                         | ok, page 6               |
| Quantitative variables       | 11             | Explain how quantitative variables were handled in the analyses. If applicable, describe which groupings were chosen and why                                                                      | ok, page 8               |
| Statistical methods          | 12             | (a) Describe all statistical methods, including those used to control for confounding                                                                                                             | ok, page 8               |
|                              |                | (b) Describe any methods used to examine subgroups and interactions                                                                                                                               | ok, page 8               |
|                              |                | (c) Explain how missing data were addressed                                                                                                                                                       | ok, page 7               |
|                              |                | (d) <i>Cohort study</i> —If applicable, explain how loss to follow-up was addressed                                                                                                               | NA                       |
|                              |                | (e) Describe any sensitivity analyses                                                                                                                                                             | NA                       |
| <b>Results</b>               |                |                                                                                                                                                                                                   |                          |
| Participants                 | 13*            | (a) Report numbers of individuals at each stage of study—eg numbers potentially eligible, examined for eligibility, confirmed eligible, included in the study, completing follow-up, and analysed | ok, page 8               |
|                              |                | (b) Give reasons for non-participation at each stage                                                                                                                                              | NA                       |
|                              |                | (c) Consider use of a flow diagram                                                                                                                                                                | NA                       |
| Descriptive data             | 14*            | (a) Give characteristics of study participants (eg demographic, clinical, social) and information on exposures and potential confounders                                                          | ok, page 8,9, suppl mat. |
|                              |                | (b) Indicate number of participants with missing data for each variable of interest                                                                                                               | ok, tables               |

|                          |     |                                                                                                                                                                                                              |                    |
|--------------------------|-----|--------------------------------------------------------------------------------------------------------------------------------------------------------------------------------------------------------------|--------------------|
|                          |     | (c) <i>Cohort study</i> —Summarise follow-up time (eg, average and total amount)                                                                                                                             | NA                 |
| Outcome data             | 15* | <i>Cohort study</i> —Report numbers of outcome events or summary measures over time                                                                                                                          | ok, tables         |
| Main results             | 16  | (a) Give unadjusted estimates and, if applicable, confounder-adjusted estimates and their precision (eg, 95% confidence interval). Make clear which confounders were adjusted for and why they were included | ok, page 9,10      |
|                          |     | (b) Report category boundaries when continuous variables were categorized                                                                                                                                    | ok, tables         |
|                          |     | (c) If relevant, consider translating estimates of relative risk into absolute risk for a meaningful time period                                                                                             | NA                 |
| Other analyses           | 17  | Report other analyses done—eg analyses of subgroups and interactions, and sensitivity analyses                                                                                                               | NA                 |
| <b>Discussion</b>        |     |                                                                                                                                                                                                              |                    |
| Key results              | 18  | Summarise key results with reference to study objectives                                                                                                                                                     | ok, pages 10       |
| Limitations              | 19  | Discuss limitations of the study, taking into account sources of potential bias or imprecision. Discuss both direction and magnitude of any potential bias                                                   | ok, pages 12,13    |
| Interpretation           | 20  | Give a cautious overall interpretation of results considering objectives, limitations, multiplicity of analyses, results from similar studies, and other relevant evidence                                   | ok, pages 10,11,12 |
| Generalisability         | 21  | Discuss the generalisability (external validity) of the study results                                                                                                                                        | ok, pages 13       |
| <b>Other information</b> |     |                                                                                                                                                                                                              |                    |
| Funding                  | 22  | Give the source of funding and the role of the funders for the present study and, if applicable, for the original study on which the present article is based                                                | ok, page 15        |

NA= not applicable
