# Supplementary material for: Social and clinical vulnerability in stroke and STEMI management during the COVID-19 pandemic: a registry-based study
Source: PubMed Central journal article supplement — BMJ Open. 2024 Jan 3;14(1):e073933. doi: 10.1136/bmjopen-2023-073933 (PMC10773394; doi:10.1136/bmjopen-2023-073933), 2024-01-03
Supplement: bmjopen-2023-073933supp002.pdf [file bmjopen-2023-073933supp002.pdf]

## Supplementary material 2.

## Description of the stroke and STEMI cohorts study sample (N=9,218)

|                                                             |                      | Stroke cohort<br>(N=6,436) |        | STEMI cohort<br>(N=2,782) |        |
|-------------------------------------------------------------|----------------------|----------------------------|--------|---------------------------|--------|
|                                                             |                      | n                          | (%)    | n                         | Median |
| <b>Patient socio-demographic characteristics</b>            |                      |                            |        |                           |        |
| <b>Sexe</b>                                                 |                      | 6,436                      |        | 2,782                     |        |
|                                                             | Male                 | 3533                       | (54.9) | 2033                      | (73.1) |
|                                                             | Female               | 2903                       | (45.1) | 749                       | (26.9) |
| <b>Age</b>                                                  |                      | 6,436                      |        | 2,776                     |        |
|                                                             | [18-65 years[        | 1201                       | (18.7) | 1381                      | (49.7) |
|                                                             | [65 years and older[ | 5235                       | (81.3) | 1395                      | (50.3) |
|                                                             | Missing values       |                            |        | 6                         |        |
| <b>Urbanicity</b>                                           |                      | 6,153                      |        | 2,543                     |        |
|                                                             | Urban                | 4,451                      | (72.3) | 1,843                     | (72.5) |
|                                                             | Rural                | 1,702                      | (27.7) | 700                       | (27.5) |
|                                                             | Missing values       | 283                        |        | 239                       |        |
| <b>Accessibility to general practitioners (APL MG 2018)</b> |                      | 6,171                      |        | 2,537                     |        |
|                                                             | [0 - 3,1[            | 989                        | (16.0) | 399                       | (15.7) |
|                                                             | [3,1 - 3,8[          | 1139                       | (18.5) | 460                       | (18.1) |
|                                                             | [3,8 - 4,7[          | 1939                       | (31.4) | 773                       | (30.5) |
|                                                             | [4,7 et plus]        | 2104                       | (34.1) | 905                       | (35.7) |
|                                                             | Missing values       | 265                        |        | 245                       |        |
| <b>Deprivation (Fdep15)</b>                                 |                      | 6,145                      |        | 2,537                     |        |
|                                                             | Most advantaged      | 994                        | (16.2) | 325                       | (12.8) |
|                                                             | Advantaged           | 1522                       | (24.8) | 596                       | (23.5) |
|                                                             | Intermediate         | 1115                       | (18.1) | 578                       | (22.8) |
|                                                             | Disadvantaged        | 1185                       | (19.3) | 578                       | (22.8) |
|                                                             | Most disadvantaged   | 1329                       | (21.6) | 460                       | (18.1) |
|                                                             | Missing values       | 291                        |        | 245                       |        |
| <b>Patient clinical history and risk factors</b>            |                      |                            |        |                           |        |
| <b>Neuro-cardiovascular history</b>                         |                      | 6,436                      |        | 2,782                     |        |
|                                                             | Absence              | 4594                       | (71.4) | 1822                      | (65.5) |
|                                                             | Presence             | 1842                       | (28.6) | 569                       | (20.5) |
|                                                             | Unknown              |                            |        | 391                       | (14.0) |
| <b>Coronary artery disease or STEMI history</b>             |                      | 6,436                      |        | 2,782                     |        |
|                                                             | No                   | 5660                       | (87.9) | 2,031                     | (73.0) |
|                                                             | Yes                  | 776                        | (12.1) | 530                       | (19.1) |
|                                                             | Unknown              |                            |        | 221                       | (7.9)  |
| <b>Coronary artery disease</b>                              |                      | 6,436                      |        |                           |        |
|                                                             | Absence              | 5,877                      | (91.3) |                           |        |
|                                                             | Presence             | 559                        | (8.7)  |                           |        |
| <b>Previous STEMI</b>                                       |                      | 6,436                      |        |                           |        |
|                                                             | Absence              | 6,057                      | (94.1) |                           |        |
|                                                             | Presence             | 379                        | (5.9)  |                           |        |
| <b>Previous stroke or transient ischemic attack</b>         |                      | 6,436                      |        |                           |        |
|                                                             | Absence              | 5,166                      | (80.3) |                           |        |
|                                                             | Presence             | 1,270                      | (19.7) |                           |        |
| <b>Peripheral arterial disease</b>                          |                      | 6,436                      |        | 2,782                     |        |
|                                                             | No                   | 6,144                      | (95.5) | 2,245                     | (80.7) |
|                                                             | Yes                  | 292                        | (4.5)  | 70                        | (2.5)  |
|                                                             | Unknown              |                            |        | 467                       | (16.8) |
| <b>Chronic renal failure</b>                                |                      |                            |        | 2,782                     |        |
|                                                             | No                   |                            |        | 2,264                     | (81.4) |
|                                                             | Yes                  |                            |        | 47                        | (1.7)  |
|                                                             | Unknown              |                            |        | 471                       | (16.9) |
| <b>Atrial fibrillation</b>                                  |                      | 6,436                      |        |                           |        |
|                                                             | Absence              | 5,348                      | (83.1) |                           |        |
|                                                             | Presence             | 1,088                      | (16.9) |                           |        |
| <b>Cardiac failure</b>                                      |                      | 6,436                      |        |                           |        |
|                                                             | Absence              | 6,114                      | (95.0) |                           |        |
|                                                             | Presence             | 322                        | (5.0)  |                           |        |

|                                                    |          |       |        |       |        |
|----------------------------------------------------|----------|-------|--------|-------|--------|
| <b>Obesity</b>                                     |          |       |        | 2,782 |        |
|                                                    | Absence  |       |        | 1801  | (64.7) |
|                                                    | Presence |       |        | 513   | (18.4) |
|                                                    | Unknown  |       |        | 468   | (16.8) |
| <b>Diabetes mellitus</b>                           |          | 6,436 |        | 2,782 |        |
|                                                    | No       | 5,198 | (80.8) | 2,119 | (76.2) |
|                                                    | Yes      | 1,238 | (19.2) | 414   | (12.9) |
|                                                    | Unknown  |       |        | 249   | (9.0)  |
| <b>Arterial hypertension</b>                       |          | 6,436 |        | 2,782 |        |
|                                                    | No       | 2,419 | (37.6) | 1,278 | (45.9) |
|                                                    | Yes      | 4,017 | (62.4) | 1,356 | (48.7) |
|                                                    | Unknown  |       |        | 148   | (5.3)  |
| <b>Dyslipidemia</b>                                |          | 6,436 |        | 2,782 |        |
|                                                    | No       | 4,618 | (71.8) | 1,708 | (61.4) |
|                                                    | Yes      | 1,818 | (28.2) | 887   | (31.9) |
|                                                    | Unknown  |       |        | 187   | (6.7)  |
| <b>Active smoking</b>                              |          | 6,436 |        | 2,782 |        |
|                                                    | No       | 5,103 | (79.3) | 1,194 | (42.9) |
|                                                    | Yes      | 1,333 | (20.7) | 1,163 | (41.8) |
|                                                    | Unknown  |       |        | 425   | (15.3) |
| <b>Familial history of coronary artery disease</b> |          |       |        | 2,782 |        |
|                                                    | No       |       |        | 2070  | (74.4) |
|                                                    | Yes      |       |        | 455   | (16.4) |
|                                                    | Unknown  |       |        | 257   | (9.2)  |

APL MG=potential accessibility to general practitioners, STEMI=segment elevation myocardial infarction.
